# Supplementary material
Source: PubMed Central journal article supplement (PMC9616252)
Supplement: mmc1.pdf [file mmc1.pdf]

# Investigating Pleiotropy Between Depression and Autoimmune Diseases Using the UK Biobank

## Supplement 1

### Table of Contents

|          |                                                                                                                                                                                         |           |
|----------|-----------------------------------------------------------------------------------------------------------------------------------------------------------------------------------------|-----------|
| <b>1</b> | <b>Power calculations .....</b>                                                                                                                                                         | <b>3</b>  |
| 1.1      | SNP-based heritability estimates .....                                                                                                                                                  | 3         |
|          | Supplementary Figure S1: SNP-based heritability ( $h^2_{\text{SNP}}$ ) of traits with publicly available summary statistics. ....                                                       | 3         |
| 1.2      | Power estimates for autoimmune PRS predicting any depression in the UKB.....                                                                                                            | 4         |
|          | Supplementary Table S1: AVENGEME inputs for calculating power to detect association between PRS for autoimmune diseases and ‘any’ depression case status in the UKB.....                | 4         |
|          | Supplementary Figure S2: Power to detect associations between autoimmune PRS and any depression case status in UKB across different levels of genetic correlation ( $r_G$ ).....        | 5         |
| 1.3      | Power estimates for depression PRS predicting autoimmune disease in the UKB.....                                                                                                        | 6         |
|          | Supplementary Table S2: AVENGEME inputs for calculating power to detect association between PRS for Major Depressive Disorder (MDD) and possible autoimmune diseases in UKB.....        | 6         |
|          | Supplementary Figure S3: Power to detect associations between MDD PRS and possible autoimmune case status in UKB across different levels of genetic correlation ( $r_G$ ).....          | 7         |
| <b>2</b> | <b>Polygenic risk score analyses .....</b>                                                                                                                                              | <b>8</b>  |
|          | Supplementary Table S3: Within-trait PRS - associations between PRS for autoimmune diseases and autoimmune case/control status (possible/probable) at optimal $P_T$ .....               | 8         |
|          | Supplementary Figure S4: Within-trait PRS - associations between PRS for autoimmune diseases and autoimmune case/control status (possible/probable) across eight $P_T$ . ....           | 10        |
|          | Supplementary Table S4: Within-trait PRS - associations between PRS for MDD and depression case/control status (any/stringent) at optimal $P_T$ .....                                   | 11        |
|          | Supplementary Figure S5: Within-trait PRS - associations between PRS for MDD and depression case/control status (any/stringent) across eight $P_T$ .....                                | 11        |
|          | Supplementary Table S5: Cross-trait PRS - associations between PRS for autoimmune diseases and depression case/control status (any/stringent) in men and women at optimal $P_T$ . ....  | 12        |
|          | Supplementary Figure S6: Cross-trait PRS –associations between PRS for autoimmune diseases and depression case/control status (any/stringent) in men and women across eight $P_T$ ..... | 14        |
|          | Supplementary Table S6: Cross-trait PRS - associations between PRS for MDD and autoimmune case/control status (possible/probable) in men and women at optimal $P_T$ .....               | 15        |
|          | Supplementary Figure S7: Cross-trait PRS –associations between PRS for MDD and autoimmune case/control status (possible/probable) in men and women across eight $P_T$ .....             | 21        |
| <b>3</b> | <b>Genetic correlations.....</b>                                                                                                                                                        | <b>22</b> |

**Supplementary Table S7: Genetic correlations between autoimmune traits and ‘any’ and ‘stringent’ depression in the UKB.....22**

**4 References..... Error! Bookmark not defined.**

## 1 Power calculations

### 1.1 SNP-based heritability estimates

Estimates of SNP-based heritability are required for power calculations using the AVENGEME software. We estimated SNP-based heritability for depression and the eight autoimmune diseases for which summary statistics were publicly available (summary statistics described in Table 1 of the main paper), and the results are shown in Supplementary Figure 1.

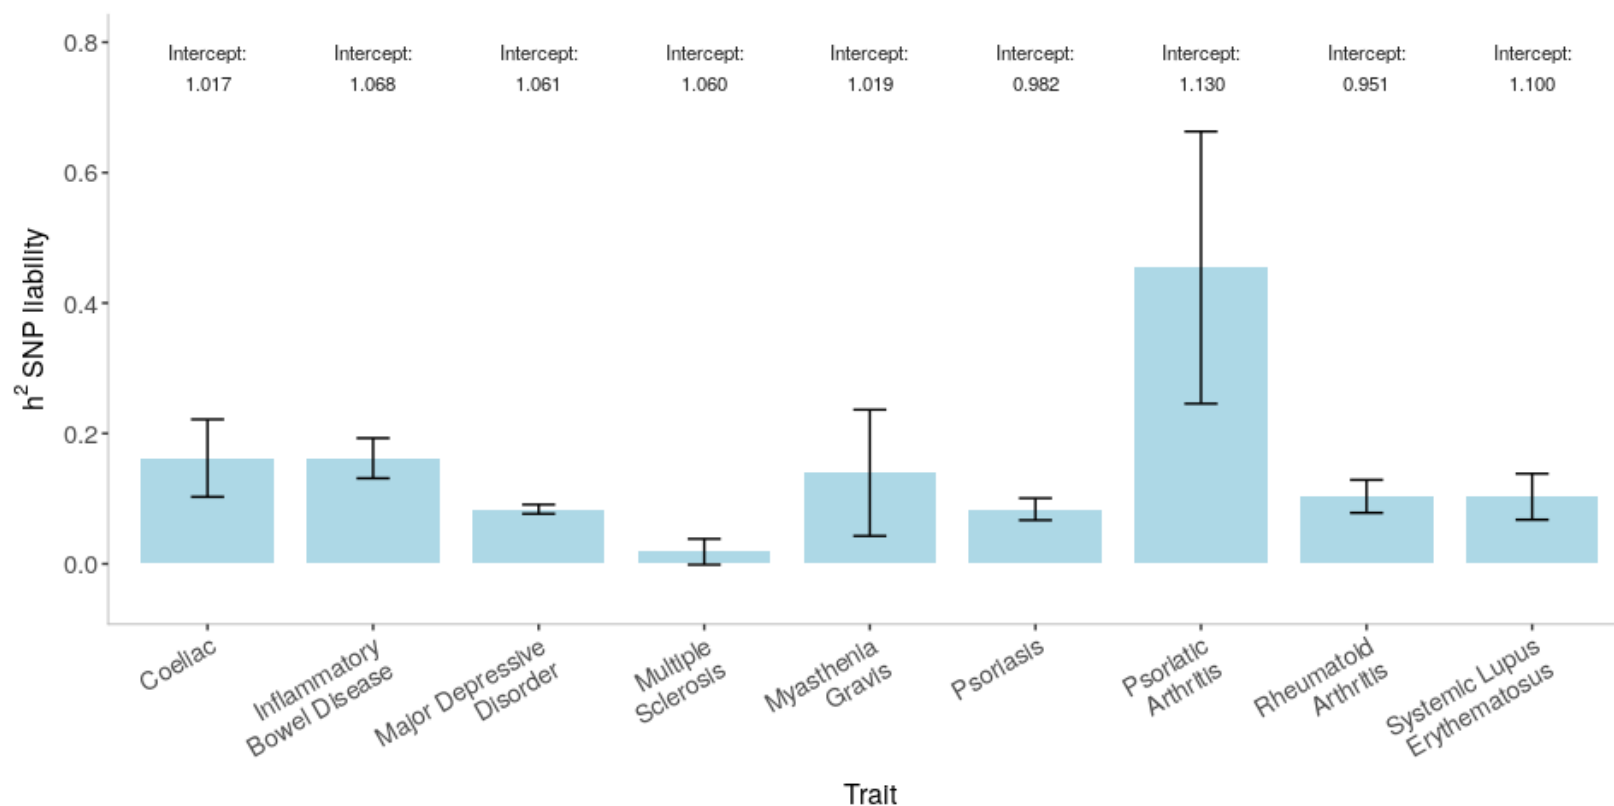

**Supplementary Figure S1:** SNP-based heritability ( $h^2_{\text{SNP}}$ ) of traits with publicly available summary statistics. Estimated using LDSC after removing variants within the MHC from summary statistics. Transformed to liability scale using population prevalence estimates: Coeliac=1%, IBD=0.5%, MDD=15%, MS=0.1%, MG=0.02%, Psoriasis=2%, PsA=0.5%, RA=1%, SLE=0.1%. Error bars: 95% CIs. Intercepts shown atop bars.

## 1.2 Power estimates for autoimmune PRS predicting any depression in the UKB

**Supplementary Table S1:** AVENGEME inputs for calculating power to detect association between PRS for autoimmune diseases and ‘any’ depression case status in the UKB.

| BASE GWAS                       |                           |                                        |                          |                      |                                               |                                                      | TARGET TRAIT   |                           |                                        |                          |                      |
|---------------------------------|---------------------------|----------------------------------------|--------------------------|----------------------|-----------------------------------------------|------------------------------------------------------|----------------|---------------------------|----------------------------------------|--------------------------|----------------------|
| Trait                           | Total N<br>(case+control) | $h^2_{\text{SNP}}$<br>excluding<br>MHC | Population<br>prevalence | Sample<br>prevalence | Optimal p-<br>value<br>threshold<br>( $P_T$ ) | No. SNPs<br>used to<br>construct<br>PRS at ( $P_T$ ) | Trait          | Total N<br>(case+control) | $h^2_{\text{SNP}}$<br>excluding<br>MHC | Population<br>prevalence | Sample<br>prevalence |
| Coeliac                         | 15,283                    | 16.21%                                 | 1.00%                    | 30%                  | 0.200                                         | 12,430                                               | Any Depression | 297,627                   | 8.38%                                  | 15%                      | 22%                  |
| Inflammatory Bowel<br>Disease   | 34,652                    | 16.20%                                 | 0.50%                    | 37%                  | 1.000                                         | 80,201                                               | Any Depression | 297,627                   | 8.38%                                  | 15%                      | 22%                  |
| Multiple Sclerosis              | 27,148                    | 1.85%                                  | 0.10%                    | 36%                  | 0.050                                         | 3,240                                                | Any Depression | 297,627                   | 8.38%                                  | 15%                      | 22%                  |
| Myasthenia Gravis               | 3,030                     | 13.96%                                 | 0.02%                    | 34%                  | 0.300                                         | 56,894                                               | Any Depression | 297,627                   | 8.38%                                  | 15%                      | 22%                  |
| Psoriasis                       | 305,801                   | 8.38%                                  | 2.00%                    | 6%                   | 1.000                                         | 136,084                                              | Any Depression | 297,627                   | 8.38%                                  | 15%                      | 22%                  |
| Psoriatic Arthritis             | 2,847                     | 45.44%                                 | 0.50%                    | 50%                  | 0.050                                         | 4,666                                                | Any Depression | 297,627                   | 8.38%                                  | 15%                      | 22%                  |
| Rheumatoid Arthritis            | 58,284                    | 10.35%                                 | 1.00%                    | 25%                  | 1.000                                         | 118,649                                              | Any Depression | 297,627                   | 8.38%                                  | 15%                      | 22%                  |
| Systemic Lupus<br>Erythematosus | 23,210                    | 10.30%                                 | 0.10%                    | 31%                  | 0.001                                         | 836                                                  | Any Depression | 297,627                   | 8.38%                                  | 15%                      | 22%                  |

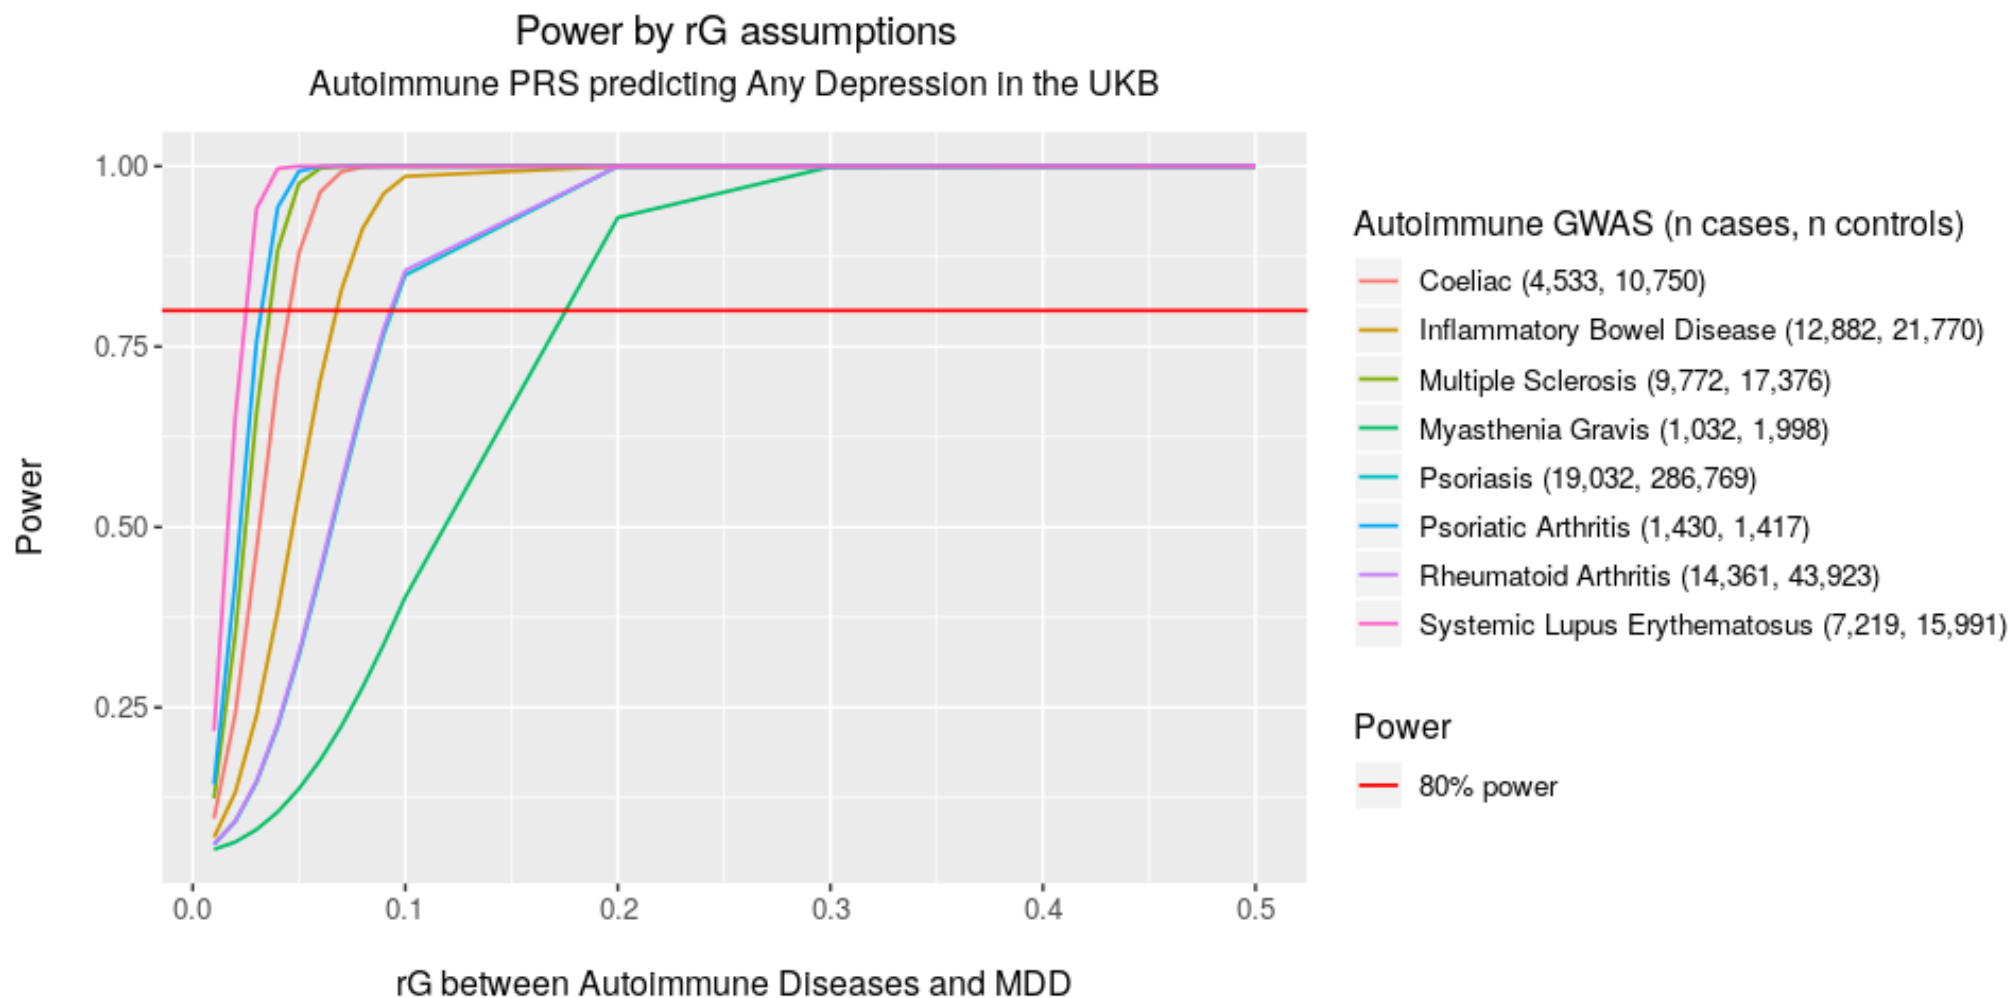

**Supplementary Figure S2:** Power to detect associations between autoimmune PRS and any depression case status in UKB across different levels of genetic correlation ( $r_G$ ).

## 1.3 Power estimates for depression PRS predicting autoimmune disease in the UKB

**Supplementary Table S2:** AVENGEME inputs for calculating power to detect association between PRS for Major Depressive Disorder (MDD) and possible autoimmune diseases in UKB.

| BASE GWAS |                           |                                        |                          |                      |                                               |                                                      | TARGET TRAIT                    |                           |                                        |                          |                      |
|-----------|---------------------------|----------------------------------------|--------------------------|----------------------|-----------------------------------------------|------------------------------------------------------|---------------------------------|---------------------------|----------------------------------------|--------------------------|----------------------|
| Trait     | Total N<br>(case+control) | $h^2_{\text{SNP}}$<br>excluding<br>MHC | Population<br>prevalence | Sample<br>prevalence | Optimal p-<br>value<br>threshold<br>( $P_T$ ) | No. SNPs<br>used to<br>construct<br>PRS at ( $P_T$ ) | Trait                           | Total N<br>(case+control) | $h^2_{\text{SNP}}$<br>excluding<br>MHC | Population<br>prevalence | Sample<br>prevalence |
| MDD       | 431,394                   | 8.38%                                  | 15%                      | 27%                  | 0.001                                         | 1,123                                                | Coeliac                         | 326,438                   | 16.21%                                 | 1.00%                    | 0.72%                |
| MDD       | 431,394                   | 8.38%                                  | 15%                      | 27%                  | 0.300                                         | 48,852                                               | Inflammatory Bowel<br>Disease   | 329,179                   | 16.20%                                 | 0.50%                    | 1.55%                |
| MDD       | 431,394                   | 8.38%                                  | 15%                      | 27%                  | 0.500                                         | 67,956                                               | Multiple Sclerosis              | 325,757                   | 1.85%                                  | 0.10%                    | 0.52%                |
| MDD       | 431,394                   | 8.38%                                  | 15%                      | 27%                  | 1.000                                         | 99,216                                               | Myasthenia Gravis               | 324,308                   | 13.96%                                 | 0.02%                    | 0.07%                |
| MDD       | 431,394                   | 8.38%                                  | 15%                      | 27%                  | 0.500                                         | 67,956                                               | Psoriasis                       | 329,533                   | 8.38%                                  | 2.00%                    | 1.66%                |
| MDD       | 431,394                   | 8.38%                                  | 15%                      | 27%                  | 1.000                                         | 99,216                                               | Psoriatic Arthritis             | 325,181                   | 45.44%                                 | 0.50%                    | 0.34%                |
| MDD       | 431,394                   | 8.38%                                  | 15%                      | 27%                  | 0.500                                         | 67,956                                               | Rheumatoid Arthritis            | 330,434                   | 10.35%                                 | 1.00%                    | 1.92%                |
| MDD       | 431,394                   | 8.38%                                  | 15%                      | 27%                  | 0.050                                         | 14,137                                               | Systemic Lupus<br>Erythematosus | 324,698                   | 10.30%                                 | 0.10%                    | 0.19%                |

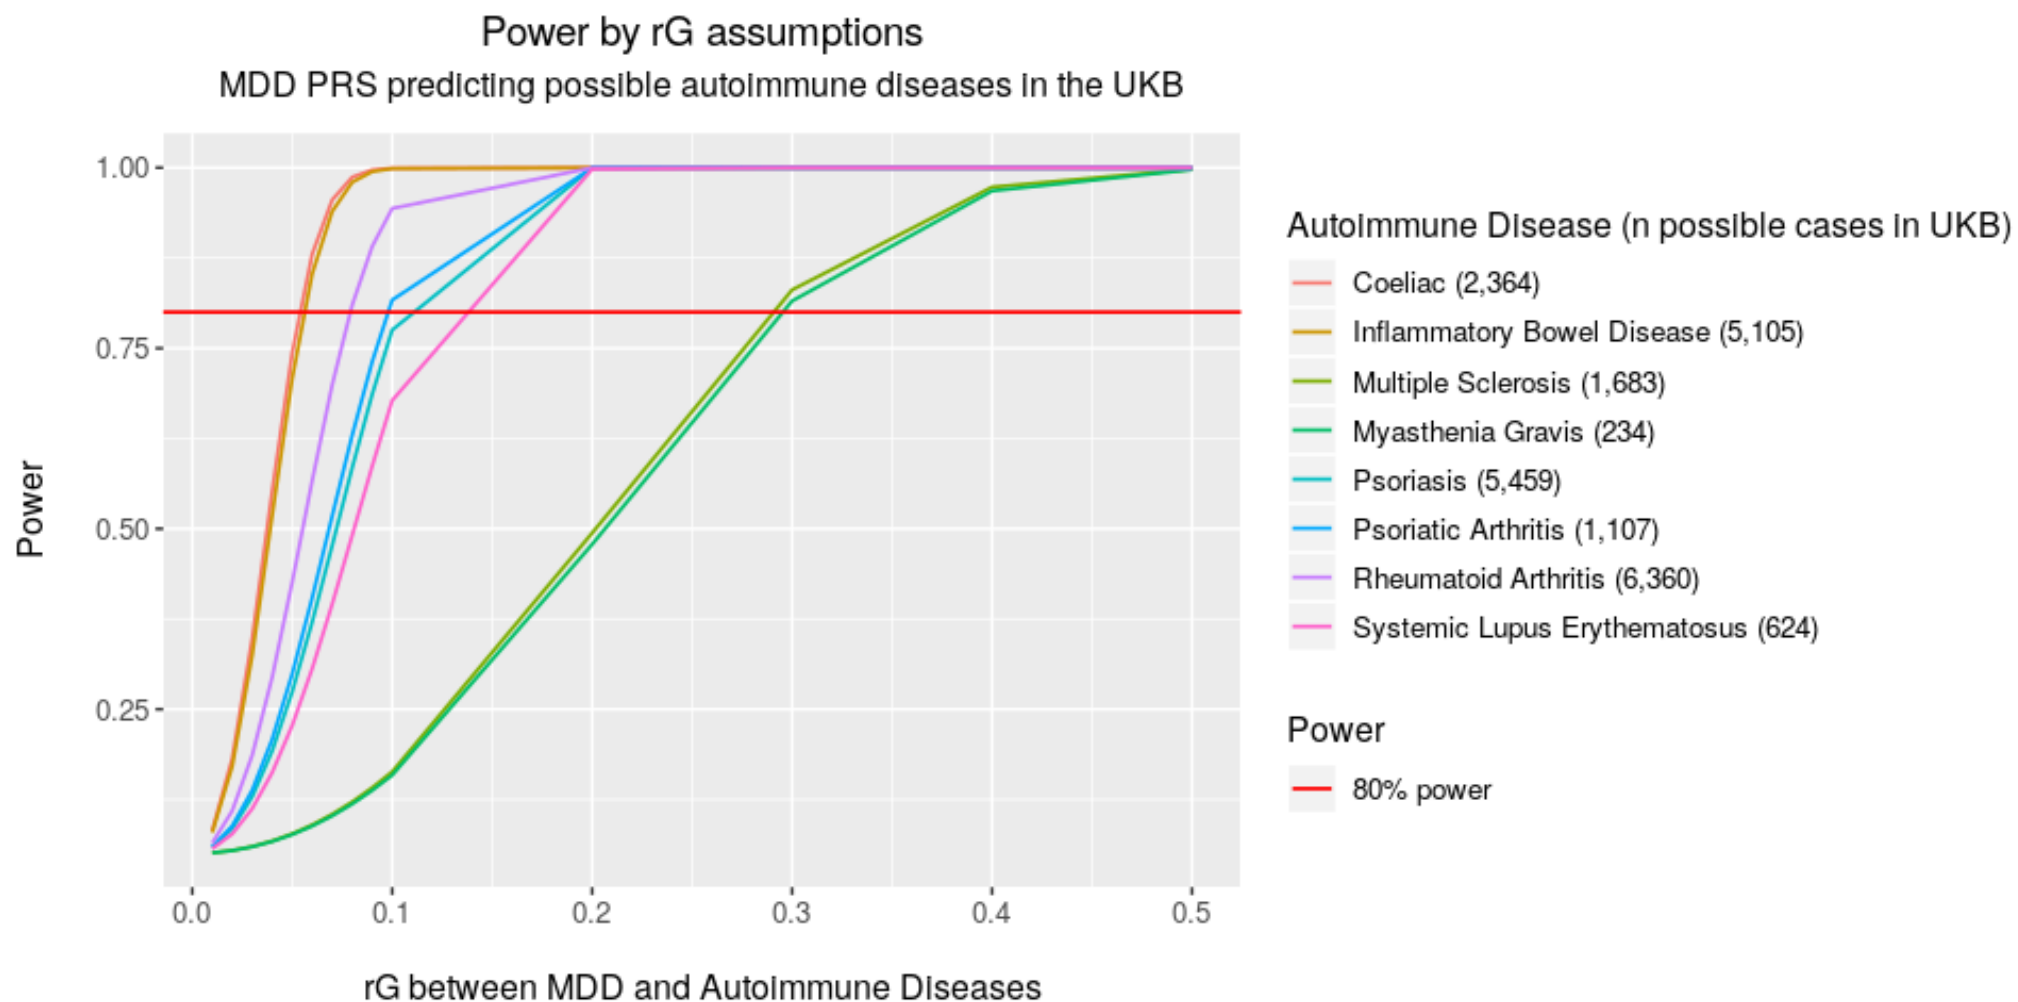

**Supplementary Figure S3:** Power to detect associations between MDD PRS and possible autoimmune case status in UKB across different levels of genetic correlation (rG).

## 2 Polygenic risk score analyses

**Supplementary Table S3:** Within-trait PRS - associations between PRS for autoimmune diseases and autoimmune case/control status (possible/probable) at optimal  $P_T$ .

| Base GWAS                    | Target Trait in UKB                     | Optimal p-value threshold ( $P_T$ ) | No. SNPs used to construct PRS at ( $P_T$ ) | Population Prevalence used to convert to liability $R^2$ | Unadjusted Variance explained (Observed $R^2$ ) | Adjusted Variance explained (Liability $R^2$ ) | Coefficient | Standard Error | P-value |
|------------------------------|-----------------------------------------|-------------------------------------|---------------------------------------------|----------------------------------------------------------|-------------------------------------------------|------------------------------------------------|-------------|----------------|---------|
| Coeliac                      | Coeliac (Possible)                      | 1.000                               | 42,731                                      | 1.00%                                                    | 1.65%                                           | 2.60%                                          | 0.46        | 0.022          | 2e-98   |
| Coeliac                      | Coeliac (Probable)                      | 1.000                               | 42,731                                      | 1.00%                                                    | 1.91%                                           | 3.37%                                          | 0.52        | 0.030          | 6e-69   |
| Inflammatory Bowel Disease   | Inflammatory Bowel Disease (Possible)   | 0.001                               | 676                                         | 0.50%                                                    | 2.41%                                           | 2.77%                                          | 0.49        | 0.014          | 5e-256  |
| Inflammatory Bowel Disease   | Inflammatory Bowel Disease (Probable)   | 0.001                               | 676                                         | 0.50%                                                    | 2.90%                                           | 3.62%                                          | 0.56        | 0.017          | 2e-233  |
| Multiple Sclerosis           | Multiple Sclerosis (Possible)           | 0.001                               | 230                                         | 0.10%                                                    | 1.42%                                           | 1.53%                                          | 0.42        | 0.025          | 4e-65   |
| Multiple Sclerosis           | Multiple Sclerosis (Probable)           | 0.001                               | 230                                         | 0.10%                                                    | 1.43%                                           | 1.64%                                          | 0.43        | 0.030          | 2e-48   |
| Myasthenia Gravis            | Myasthenia Gravis (Possible)            | 0.100                               | 22,895                                      | 0.02%                                                    | 0.31%                                           | 0.35%                                          | 0.23        | 0.066          | 6e-04   |
| Myasthenia Gravis            | Myasthenia Gravis (Probable)            | 0.100                               | 22,895                                      | 0.02%                                                    | 0.28%                                           | 0.34%                                          | 0.23        | 0.084          | 7e-03   |
| Psoriasis                    | Psoriasis (Possible)                    | 0.001                               | 637                                         | 2.00%                                                    | 2.08%                                           | 3.24%                                          | 0.44        | 0.013          | 5e-236  |
| Psoriasis                    | Psoriasis (Probable)                    | 0.001                               | 637                                         | 2.00%                                                    | 2.27%                                           | 4.11%                                          | 0.49        | 0.019          | 1e-154  |
| Psoriatic Arthritis          | Psoriatic Arthritis (Possible)          | 0.200                               | 14,198                                      | 0.50%                                                    | 0.19%                                           | 0.29%                                          | 0.27        | 0.052          | 2e-07   |
| Psoriatic Arthritis          | Psoriatic Arthritis (Probable)          | 1.000                               | 45,914                                      | 0.50%                                                    | 0.20%                                           | 0.34%                                          | 0.31        | 0.066          | 3e-06   |
| Rheumatoid Arthritis         | Rheumatoid Arthritis (Possible)         | 0.001                               | 550                                         | 1.00%                                                    | 0.58%                                           | 0.73%                                          | 0.23        | 0.013          | 3e-74   |
| Rheumatoid Arthritis         | Rheumatoid Arthritis (Probable)         | 0.001                               | 550                                         | 1.00%                                                    | 1.12%                                           | 1.63%                                          | 0.34        | 0.017          | 2e-90   |
| Systemic Lupus Erythematosus | Systemic Lupus Erythematosus (Possible) | 0.001                               | 836                                         | 0.10%                                                    | 1.37%                                           | 1.73%                                          | 0.42        | 0.037          | 6e-30   |
| Systemic Lupus Erythematosus | Systemic Lupus Erythematosus (Probable) | 0.300                               | 74,372                                      | 0.10%                                                    | 2.14%                                           | 2.92%                                          | 0.58        | 0.052          | 6e-29   |



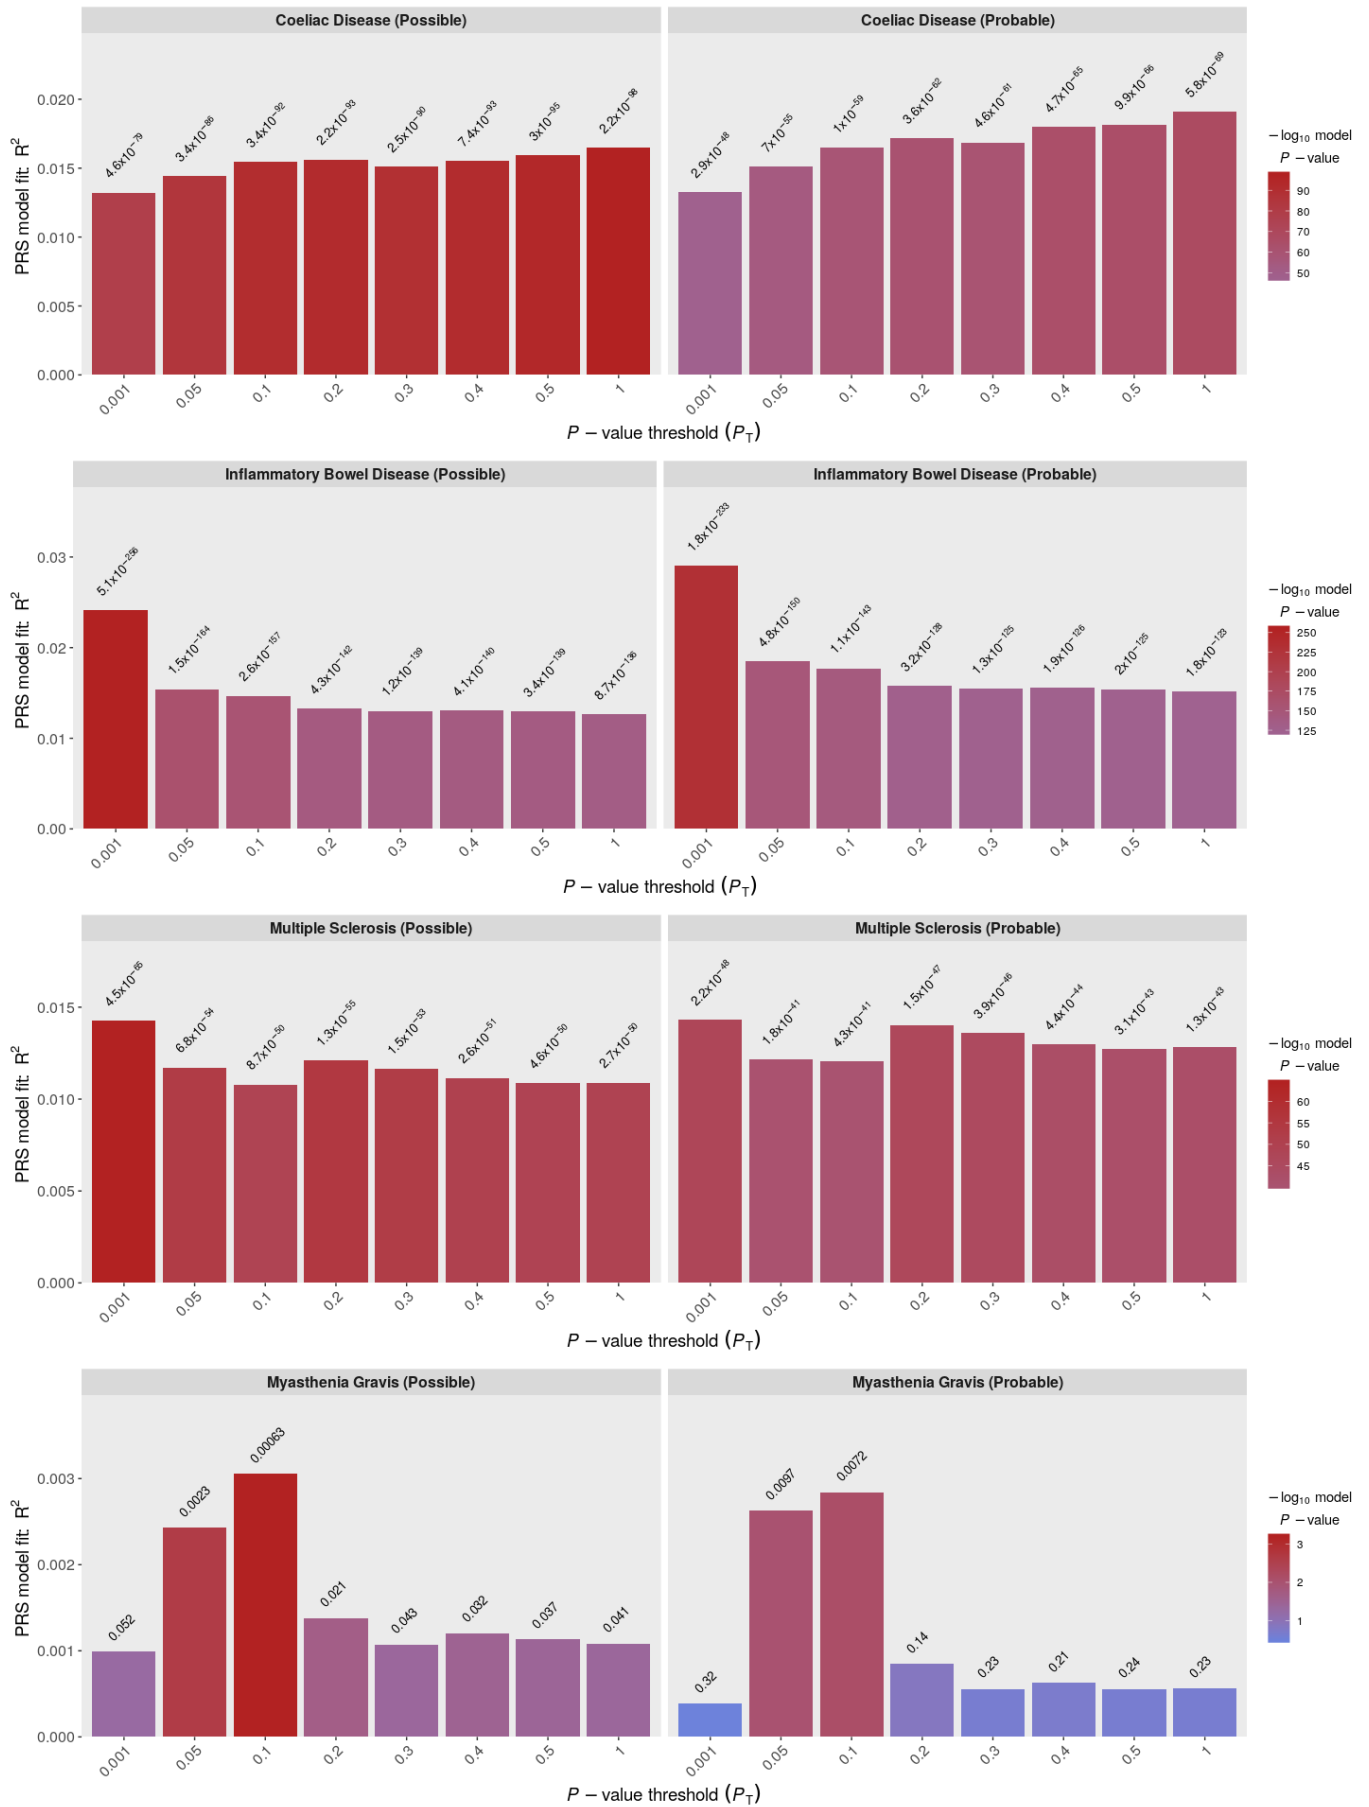

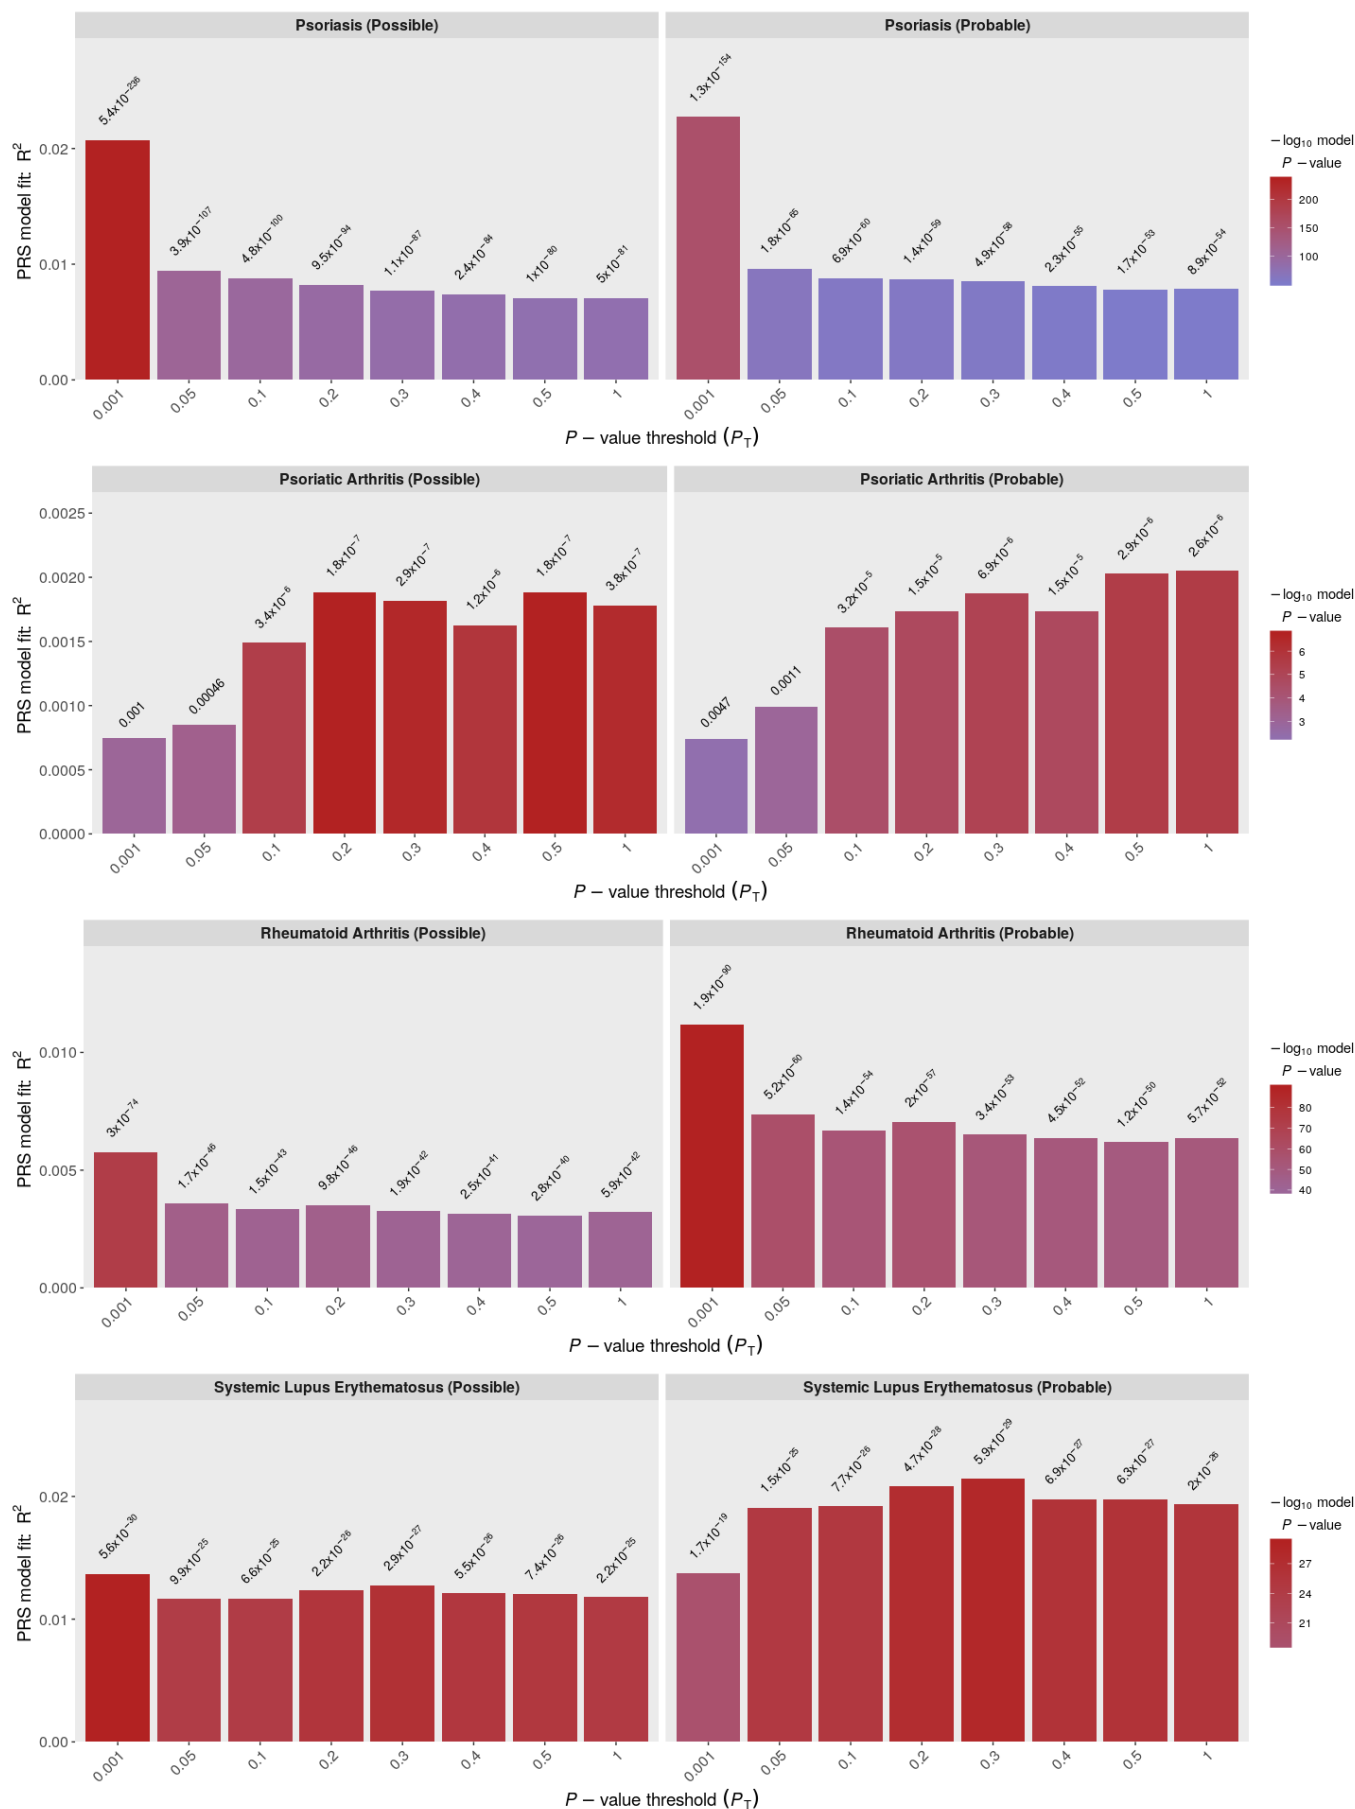

**Supplementary Figure S4:** Within-trait PRS - associations between PRS for autoimmune diseases and autoimmune case/control status (possible/probable) across eight P<sub>T</sub>. Y-axis shows unadjusted R<sup>2</sup> (observed-scale).

**Supplementary Table S4:** Within-trait PRS - associations between PRS for MDD and depression case/control status (any/stringent) at optimal  $P_T$ .

| Base GWAS                 | Target Trait in UKB    | Optimal p-value threshold ( $P_T$ ) | No. SNPs used to construct PRS at ( $P_T$ ) | Population Prevalence used to convert to liability $R^2$ | Unadjusted Variance explained (Observed $R^2$ ) | Adjusted Variance explained (Liability $R^2$ ) | Coefficient | Standard Error | P-value |
|---------------------------|------------------------|-------------------------------------|---------------------------------------------|----------------------------------------------------------|-------------------------------------------------|------------------------------------------------|-------------|----------------|---------|
| Major Depressive Disorder | Depression (Any)       | 0.4                                 | 59,001                                      | 15%                                                      | 1.30%                                           | 1.48%                                          | 0.23        | 0.005          | <5e-324 |
| Major Depressive Disorder | Depression (Stringent) | 0.4                                 | 59,001                                      | 15%                                                      | 1.16%                                           | 2.23%                                          | 0.28        | 0.009          | 2e-228  |

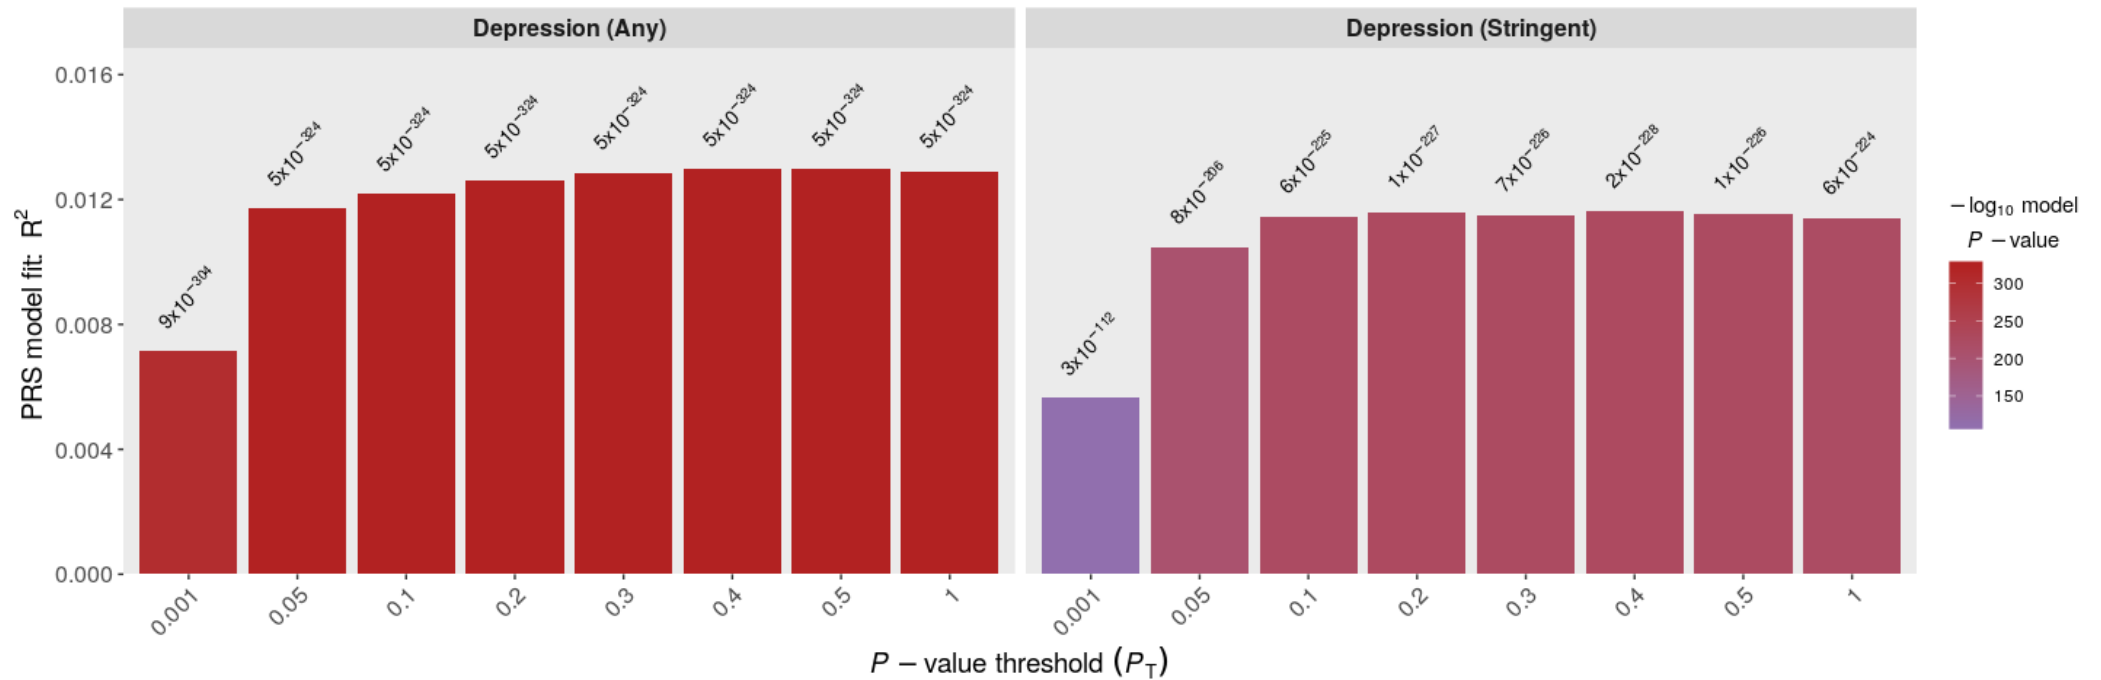

**Supplementary Figure S5:** Within-trait PRS - associations between PRS for MDD and depression case/control status (any/stringent) across eight  $P_T$ . Y-axis shows unadjusted  $R^2$  (observed-scale). Note: p-value for MDD PRS predicting Depression (Any) = 0 for thresholds 0.05 to 1 due to limit on the smallest number on the R platform (5e-324).

**Supplementary Table S5:** Cross-trait PRS - associations between PRS for autoimmune diseases and depression case/control status (any/stringent) in men and women at optimal  $P_T$ . Associations with p-values <  $7.1 \times 10^{-5}$ , meeting Bonferroni correction, highlighted in red.

| Base GWAS                  | Target Trait in UKB         | Optimal p-value threshold ( $P_T$ ) | No. SNPs used to construct PRS at ( $P_T$ ) | Population Prevalence used to convert to liability $R^2$ | Unadjusted Variance explained (Observed $R^2$ ) | Adjusted Variance explained (Liability $R^2$ ) | Coefficient  | Standard Error | P-value        |
|----------------------------|-----------------------------|-------------------------------------|---------------------------------------------|----------------------------------------------------------|-------------------------------------------------|------------------------------------------------|--------------|----------------|----------------|
| Coeliac                    | Any (combined)              | 0.200                               | 12,430                                      | 15%                                                      | 0.0021%                                         | 0.0024%                                        | 0.009        | 0.005          | 4.4e-02        |
| Coeliac                    | Any (female)                | 0.200                               | 12,430                                      | 15%                                                      | 0.0006%                                         | 0.0007%                                        | 0.005        | 0.006          | 4.1e-01        |
| Coeliac                    | Any (male)                  | 0.050                               | 3,881                                       | 15%                                                      | 0.0045%                                         | 0.0060%                                        | 0.015        | 0.008          | 5.4e-02        |
| Coeliac                    | Stringent (combined)        | 0.200                               | 12,430                                      | 15%                                                      | 0.0013%                                         | 0.0026%                                        | 0.010        | 0.009          | 2.7e-01        |
| Coeliac                    | Stringent (female)          | 0.001                               | 186                                         | 15%                                                      | 0.0017%                                         | 0.0029%                                        | 0.010        | 0.011          | 3.4e-01        |
| Coeliac                    | Stringent (male)            | 0.001                               | 186                                         | 15%                                                      | 0.0034%                                         | 0.0075%                                        | -0.016       | 0.015          | 2.7e-01        |
| Inflammatory Bowel Disease | Any (combined)              | 1.000                               | 80,201                                      | 15%                                                      | 0.0051%                                         | 0.0058%                                        | 0.014        | 0.005          | 1.6e-03        |
| Inflammatory Bowel Disease | Any (female)                | 1.000                               | 80,201                                      | 15%                                                      | 0.0047%                                         | 0.0049%                                        | 0.013        | 0.006          | 2.4e-02        |
| Inflammatory Bowel Disease | Any (male)                  | 1.000                               | 80,201                                      | 15%                                                      | 0.0079%                                         | 0.0106%                                        | 0.019        | 0.008          | 1.0e-02        |
| Inflammatory Bowel Disease | Stringent (combined)        | 0.300                               | 38,677                                      | 15%                                                      | 0.0173%                                         | 0.0333%                                        | 0.035        | 0.009          | 7.9e-05        |
| Inflammatory Bowel Disease | Stringent (female)          | 0.050                               | 10,082                                      | 15%                                                      | 0.0238%                                         | 0.0406%                                        | 0.038        | 0.011          | 4.4e-04        |
| Inflammatory Bowel Disease | Stringent (male)            | 1.000                               | 80,201                                      | 15%                                                      | 0.0230%                                         | 0.0510%                                        | 0.043        | 0.015          | 4.2e-03        |
| Lupus                      | Any (combined)              | 0.001                               | 836                                         | 15%                                                      | 0.0029%                                         | 0.0034%                                        | -0.011       | 0.004          | 1.7e-02        |
| Lupus                      | Any (female)                | 0.001                               | 836                                         | 15%                                                      | 0.0026%                                         | 0.0027%                                        | -0.010       | 0.006          | 9.4e-02        |
| Lupus                      | Any (male)                  | 0.001                               | 836                                         | 15%                                                      | 0.0056%                                         | 0.0075%                                        | -0.016       | 0.007          | 3.1e-02        |
| Lupus                      | Stringent (combined)        | 0.001                               | 836                                         | 15%                                                      | 0.0018%                                         | 0.0035%                                        | -0.011       | 0.009          | 2.0e-01        |
| Lupus                      | Stringent (female)          | 0.001                               | 836                                         | 15%                                                      | 0.0038%                                         | 0.0066%                                        | -0.015       | 0.011          | 1.6e-01        |
| Lupus                      | Stringent (male)            | 0.050                               | 18,572                                      | 15%                                                      | 0.0020%                                         | 0.0045%                                        | 0.013        | 0.015          | 3.9e-01        |
| Multiple Sclerosis         | Any (combined)              | 0.050                               | 3,240                                       | 15%                                                      | 0.0052%                                         | 0.0059%                                        | 0.014        | 0.005          | 1.5e-03        |
| Multiple Sclerosis         | Any (female)                | 0.050                               | 3,240                                       | 15%                                                      | 0.0066%                                         | 0.0068%                                        | 0.015        | 0.006          | 7.4e-03        |
| Multiple Sclerosis         | Any (male)                  | 0.050                               | 3,240                                       | 15%                                                      | 0.0058%                                         | 0.0078%                                        | 0.016        | 0.007          | 2.8e-02        |
| Multiple Sclerosis         | Stringent (combined)        | 0.050                               | 3,240                                       | 15%                                                      | 0.0033%                                         | 0.0063%                                        | 0.015        | 0.009          | 8.6e-02        |
| Multiple Sclerosis         | Stringent (female)          | 0.100                               | 5,974                                       | 15%                                                      | 0.0087%                                         | 0.0148%                                        | 0.023        | 0.011          | 3.4e-02        |
| Multiple Sclerosis         | Stringent (male)            | 0.050                               | 3,240                                       | 15%                                                      | 0.0024%                                         | 0.0053%                                        | 0.014        | 0.015          | 3.6e-01        |
| <b>Myasthenia Gravis</b>   | <b>Any (combined)</b>       | <b>0.300</b>                        | <b>56,894</b>                               | <b>15%</b>                                               | <b>0.0084%</b>                                  | <b>0.0096%</b>                                 | <b>0.018</b> | <b>0.005</b>   | <b>5.2e-05</b> |
| Myasthenia Gravis          | Any (female)                | 0.200                               | 40,875                                      | 15%                                                      | 0.0127%                                         | 0.0131%                                        | 0.022        | 0.006          | 2.1e-04        |
| Myasthenia Gravis          | Any (male)                  | 0.300                               | 56,894                                      | 15%                                                      | 0.0073%                                         | 0.0098%                                        | 0.019        | 0.008          | 1.4e-02        |
| <b>Myasthenia Gravis</b>   | <b>Stringent (combined)</b> | <b>0.300</b>                        | <b>56,894</b>                               | <b>15%</b>                                               | <b>0.0208%</b>                                  | <b>0.0399%</b>                                 | <b>0.038</b> | <b>0.009</b>   | <b>1.6e-05</b> |
| Myasthenia Gravis          | Stringent (female)          | 0.300                               | 56,894                                      | 15%                                                      | 0.0164%                                         | 0.0279%                                        | 0.032        | 0.011          | 3.5e-03        |
| Myasthenia Gravis          | Stringent (male)            | 0.300                               | 56,894                                      | 15%                                                      | 0.0384%                                         | 0.0849%                                        | 0.055        | 0.015          | 2.2e-04        |

| Base GWAS            | Target Trait in UKB   | Optimal p-value threshold ( $P_T$ ) | No. SNPs used to construct PRS at ( $P_T$ ) | Population Prevalence used to convert to liability $R^2$ | Unadjusted Variance explained (Observed $R^2$ ) | Adjusted Variance explained (Liability $R^2$ ) | Coefficient  | Standard Error | P-value        |
|----------------------|-----------------------|-------------------------------------|---------------------------------------------|----------------------------------------------------------|-------------------------------------------------|------------------------------------------------|--------------|----------------|----------------|
| <b>Psoriasis</b>     | <b>Any (combined)</b> | <b>1.000</b>                        | <b>136,084</b>                              | <b>15%</b>                                               | <b>0.0101%</b>                                  | <b>0.0116%</b>                                 | <b>0.020</b> | <b>0.005</b>   | <b>8.7e-06</b> |
| Psoriasis            | Any (female)          | 1.000                               | 136,084                                     | 15%                                                      | 0.0124%                                         | 0.0128%                                        | 0.021        | 0.006          | 2.5e-04        |
| Psoriasis            | Any (male)            | 0.050                               | 13,899                                      | 15%                                                      | 0.0133%                                         | 0.0178%                                        | 0.025        | 0.007          | 8.9e-04        |
| Psoriasis            | Stringent (combined)  | 0.050                               | 13,899                                      | 15%                                                      | 0.0126%                                         | 0.0243%                                        | 0.029        | 0.009          | 7.6e-04        |
| Psoriasis            | Stringent (female)    | 1.000                               | 136,084                                     | 15%                                                      | 0.0177%                                         | 0.0303%                                        | 0.033        | 0.011          | 2.4e-03        |
| Psoriasis            | Stringent (male)      | 0.050                               | 13,899                                      | 15%                                                      | 0.0093%                                         | 0.0207%                                        | 0.027        | 0.015          | 6.8e-02        |
| Psoriatic Arthritis  | Any (combined)        | 0.050                               | 4,666                                       | 15%                                                      | 0.0013%                                         | 0.0015%                                        | -0.010       | 0.007          | 1.1e-01        |
| Psoriatic Arthritis  | Any (female)          | 1.000                               | 45,914                                      | 15%                                                      | 0.0026%                                         | 0.0027%                                        | 0.018        | 0.011          | 9.2e-02        |
| Psoriatic Arthritis  | Any (male)            | 0.100                               | 8,135                                       | 15%                                                      | 0.0058%                                         | 0.0077%                                        | -0.026       | 0.012          | 2.8e-02        |
| Psoriatic Arthritis  | Stringent (combined)  | 0.001                               | 211                                         | 15%                                                      | 0.0018%                                         | 0.0036%                                        | 0.012        | 0.009          | 2.0e-01        |
| Psoriatic Arthritis  | Stringent (female)    | 1.000                               | 45,914                                      | 15%                                                      | 0.0086%                                         | 0.0147%                                        | 0.042        | 0.020          | 3.4e-02        |
| Psoriatic Arthritis  | Stringent (male)      | 0.100                               | 8,135                                       | 15%                                                      | 0.0081%                                         | 0.0178%                                        | -0.039       | 0.023          | 9.1e-02        |
| Rheumatoid Arthritis | Any (combined)        | 1.000                               | 118,649                                     | 15%                                                      | 0.0006%                                         | 0.0007%                                        | 0.005        | 0.005          | 2.6e-01        |
| Rheumatoid Arthritis | Any (female)          | 0.001                               | 550                                         | 15%                                                      | 0.0011%                                         | 0.0011%                                        | -0.006       | 0.006          | 2.8e-01        |
| Rheumatoid Arthritis | Any (male)            | 1.000                               | 118,649                                     | 15%                                                      | 0.0059%                                         | 0.0079%                                        | 0.017        | 0.008          | 2.7e-02        |
| Rheumatoid Arthritis | Stringent (combined)  | 1.000                               | 118,649                                     | 15%                                                      | 0.0095%                                         | 0.0183%                                        | 0.025        | 0.009          | 3.4e-03        |
| Rheumatoid Arthritis | Stringent (female)    | 0.001                               | 550                                         | 15%                                                      | 0.0047%                                         | 0.0080%                                        | 0.017        | 0.011          | 1.2e-01        |
| Rheumatoid Arthritis | Stringent (male)      | 1.000                               | 118,649                                     | 15%                                                      | 0.0232%                                         | 0.0514%                                        | 0.043        | 0.015          | 4.1e-03        |

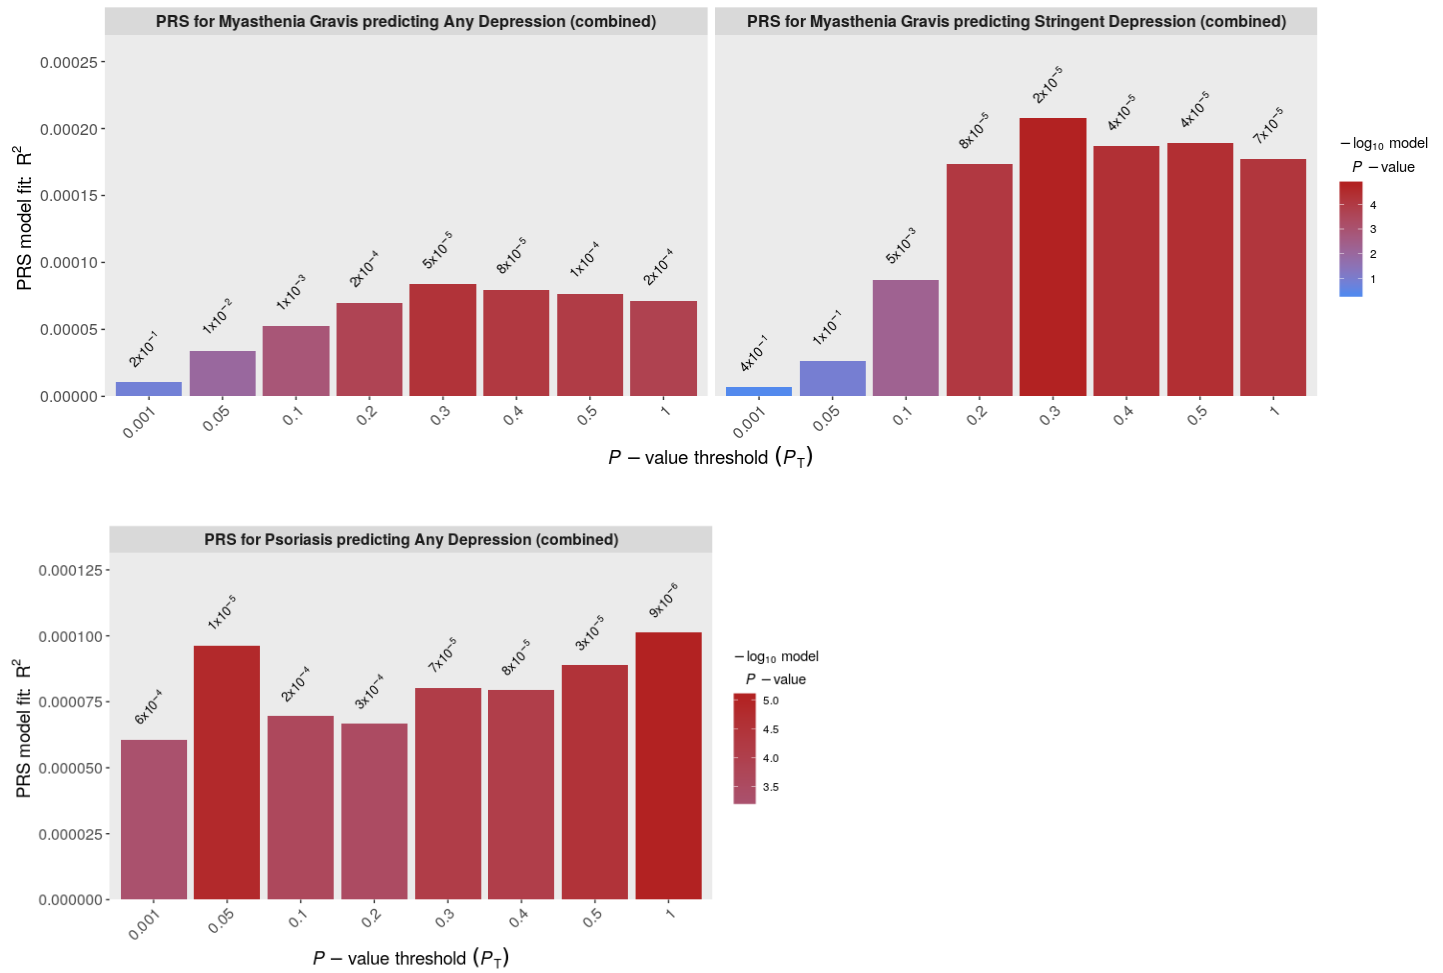

**Supplementary Figure S6:** Cross-trait PRS –associations between PRS for autoimmune diseases and depression case/control status (any/stringent) in men and women across eight  $P_T$ . Y-axis shows unadjusted  $R^2$  (observed-scale). Bar charts are shown for significant results only.

**Supplementary Table S6:** Cross-trait PRS - associations between PRS for MDD and autoimmune case/control status (possible/probable) in men and women at optimal  $P_T$ . MDD = Major Depressive Disorder. Associations with p-values  $< 7.1 \times 10^{-5}$ , meeting Bonferroni correction, highlighted in red. Sex\*PRS p-value – estimated where significant associations were observed in sex-specific analyses; tested for an interaction between sex and PRS in the full sample (Phenotype  $\sim$  sex + PRS + sex\*PRS + covariates).

| Base GWAS | Target Trait in UKB                             | Optimal p-value threshold ( $P_T$ ) | No. SNPs used to construct PRS at ( $P_T$ ) | Population Prevalence used to convert to liability $R^2$ | Unadjusted Variance explained (Observed $R^2$ ) | Adjusted Variance explained (Liability $R^2$ ) | Coefficient | Standard Error | P-value | Sex*PRS p-value |
|-----------|-------------------------------------------------|-------------------------------------|---------------------------------------------|----------------------------------------------------------|-------------------------------------------------|------------------------------------------------|-------------|----------------|---------|-----------------|
| MDD       | Ankylosing Spondylitis, Possible (combined)     | 0.050                               | 14,137                                      | 0.55%                                                    | 0.035%                                          | 0.054%                                         | 0.067       | 0.027          | 1.4e-02 | NA              |
| MDD       | Ankylosing Spondylitis, Possible (female)       | 0.001                               | 1,123                                       | 0.55%                                                    | 0.130%                                          | 0.210%                                         | 0.132       | 0.044          | 2.8e-03 | NA              |
| MDD       | Ankylosing Spondylitis, Possible (male)         | 1.000                               | 99,216                                      | 0.55%                                                    | 0.043%                                          | 0.063%                                         | 0.072       | 0.035          | 3.9e-02 | NA              |
| MDD       | Ankylosing Spondylitis, Probable (combined)     | 0.001                               | 1,123                                       | 0.55%                                                    | 0.003%                                          | 0.006%                                         | -0.022      | 0.049          | 6.5e-01 | NA              |
| MDD       | Ankylosing Spondylitis, Probable (female)       | 0.400                               | 59,001                                      | 0.55%                                                    | 0.032%                                          | 0.064%                                         | -0.074      | 0.096          | 4.5e-01 | NA              |
| MDD       | Ankylosing Spondylitis, Probable (male)         | 0.001                               | 1,123                                       | 0.55%                                                    | 0.005%                                          | 0.008%                                         | -0.026      | 0.057          | 6.5e-01 | NA              |
| MDD       | Autoimmune Thyroid Disease, Possible (combined) | 0.500                               | 67,956                                      | 2.00%                                                    | 0.078%                                          | 0.173%                                         | 0.104       | 0.034          | 2.6e-03 | NA              |
| MDD       | Autoimmune Thyroid Disease, Possible (female)   | 0.500                               | 67,956                                      | 2.00%                                                    | 0.075%                                          | 0.154%                                         | 0.098       | 0.037          | 8.8e-03 | NA              |
| MDD       | Autoimmune Thyroid Disease, Possible (male)     | 0.500                               | 67,956                                      | 2.00%                                                    | 0.110%                                          | 0.278%                                         | 0.133       | 0.087          | 1.3e-01 | NA              |
| MDD       | Autoimmune Thyroid Disease, Probable (combined) | 0.400                               | 59,001                                      | 2.00%                                                    | 0.083%                                          | 0.193%                                         | 0.110       | 0.041          | 7.3e-03 | NA              |
| MDD       | Autoimmune Thyroid Disease, Probable (female)   | 0.400                               | 59,001                                      | 2.00%                                                    | 0.082%                                          | 0.178%                                         | 0.105       | 0.044          | 1.7e-02 | NA              |
| MDD       | Autoimmune Thyroid Disease, Probable (male)     | 0.001                               | 1,123                                       | 2.00%                                                    | 0.138%                                          | 0.363%                                         | -0.153      | 0.108          | 1.5e-01 | NA              |
| MDD       | Coeliac, Possible (combined)                    | 0.001                               | 1,123                                       | 1.00%                                                    | 0.109%                                          | 0.172%                                         | -0.112      | 0.021          | 6.0e-08 | NA              |
| MDD       | Coeliac, Possible (female)                      | 0.001                               | 1,123                                       | 1.00%                                                    | 0.147%                                          | 0.221%                                         | -0.127      | 0.025          | 5.4e-07 | 0.33            |
| MDD       | Coeliac, Possible (male)                        | 0.001                               | 1,123                                       | 1.00%                                                    | 0.054%                                          | 0.091%                                         | -0.082      | 0.036          | 2.3e-02 | NA              |
| MDD       | Coeliac, Probable (combined)                    | 0.001                               | 1,123                                       | 1.00%                                                    | 0.059%                                          | 0.104%                                         | -0.087      | 0.028          | 2.0e-03 | NA              |
| MDD       | Coeliac, Probable (female)                      | 0.001                               | 1,123                                       | 1.00%                                                    | 0.066%                                          | 0.110%                                         | -0.090      | 0.034          | 8.7e-03 | NA              |
| MDD       | Coeliac, Probable (male)                        | 0.001                               | 1,123                                       | 1.00%                                                    | 0.048%                                          | 0.090%                                         | -0.081      | 0.050          | 1.1e-01 | NA              |

| Base GWAS | Target Trait in UKB                             | Optimal p-value threshold ( $P_T$ ) | No. SNPs used to construct PRS at ( $P_T$ ) | Population Prevalence used to convert to liability $R^2$ | Unadjusted Variance explained (Observed $R^2$ ) | Adjusted Variance explained (Liability $R^2$ ) | Coefficient | Standard Error | P-value | Sex*PRS p-value |
|-----------|-------------------------------------------------|-------------------------------------|---------------------------------------------|----------------------------------------------------------|-------------------------------------------------|------------------------------------------------|-------------|----------------|---------|-----------------|
| MDD       | Inflammatory Bowel Disease, Possible (combined) | 0.300                               | 48,852                                      | 0.50%                                                    | 0.051%                                          | 0.058%                                         | 0.071       | 0.014          | 6.5e-07 | NA              |
| MDD       | Inflammatory Bowel Disease, Possible (female)   | 0.050                               | 14,137                                      | 0.50%                                                    | 0.103%                                          | 0.119%                                         | 0.100       | 0.020          | 4.0e-07 | 0.02            |
| MDD       | Inflammatory Bowel Disease, Possible (male)     | 0.300                               | 48,852                                      | 0.50%                                                    | 0.044%                                          | 0.051%                                         | 0.066       | 0.020          | 1.2e-03 | NA              |
| MDD       | Inflammatory Bowel Disease, Probable (combined) | 0.050                               | 14,137                                      | 0.50%                                                    | 0.029%                                          | 0.036%                                         | 0.055       | 0.017          | 1.2e-03 | NA              |
| MDD       | Inflammatory Bowel Disease, Probable (female)   | 0.050                               | 14,137                                      | 0.50%                                                    | 0.083%                                          | 0.104%                                         | 0.094       | 0.024          | 9.0e-05 | NA              |
| MDD       | Inflammatory Bowel Disease, Probable (male)     | 1.000                               | 99,216                                      | 0.50%                                                    | 0.014%                                          | 0.017%                                         | 0.038       | 0.024          | 1.1e-01 | NA              |
| MDD       | Multiple Sclerosis, Possible (combined)         | 0.500                               | 67,956                                      | 0.10%                                                    | 0.047%                                          | 0.051%                                         | 0.076       | 0.025          | 1.9e-03 | NA              |
| MDD       | Multiple Sclerosis, Possible (female)           | 0.001                               | 1,123                                       | 0.10%                                                    | 0.058%                                          | 0.059%                                         | 0.082       | 0.029          | 4.4e-03 | NA              |
| MDD       | Multiple Sclerosis, Possible (male)             | 0.050                               | 14,137                                      | 0.10%                                                    | 0.115%                                          | 0.136%                                         | 0.125       | 0.047          | 8.1e-03 | NA              |
| MDD       | Multiple Sclerosis, Probable (combined)         | 1.000                               | 99,216                                      | 0.10%                                                    | 0.064%                                          | 0.073%                                         | 0.091       | 0.030          | 2.0e-03 | NA              |
| MDD       | Multiple Sclerosis, Probable (female)           | 0.001                               | 1,123                                       | 0.10%                                                    | 0.081%                                          | 0.088%                                         | 0.100       | 0.035          | 3.9e-03 | NA              |
| MDD       | Multiple Sclerosis, Probable (male)             | 0.050                               | 14,137                                      | 0.10%                                                    | 0.160%                                          | 0.201%                                         | 0.152       | 0.057          | 7.6e-03 | NA              |
| MDD       | Myasthenia Gravis, Possible (combined)          | 1.000                               | 99,216                                      | 0.02%                                                    | 0.045%                                          | 0.052%                                         | 0.087       | 0.066          | 1.9e-01 | NA              |
| MDD       | Myasthenia Gravis, Possible (female)            | 1.000                               | 99,216                                      | 0.02%                                                    | 0.178%                                          | 0.202%                                         | 0.171       | 0.088          | 5.1e-02 | NA              |
| MDD       | Myasthenia Gravis, Possible (male)              | 0.100                               | 22,831                                      | 0.02%                                                    | 0.014%                                          | 0.016%                                         | -0.048      | 0.099          | 6.3e-01 | NA              |
| MDD       | Myasthenia Gravis, Probable (combined)          | 0.001                               | 1,123                                       | 0.02%                                                    | 0.014%                                          | 0.017%                                         | 0.050       | 0.082          | 5.5e-01 | NA              |
| MDD       | Myasthenia Gravis, Probable (female)            | 1.000                               | 99,216                                      | 0.02%                                                    | 0.075%                                          | 0.092%                                         | 0.115       | 0.119          | 3.3e-01 | NA              |
| MDD       | Myasthenia Gravis, Probable (male)              | 1.000                               | 99,216                                      | 0.02%                                                    | 0.071%                                          | 0.085%                                         | -0.112      | 0.116          | 3.4e-01 | NA              |
| MDD       | Pernicious Anemia, Possible (combined)          | 0.050                               | 14,137                                      | 0.10%                                                    | 0.035%                                          | 0.038%                                         | 0.066       | 0.025          | 9.4e-03 | NA              |



| Base GWAS | Target Trait in UKB                             | Optimal p-value threshold ( $P_T$ ) | No. SNPs used to construct PRS at ( $P_T$ ) | Population Prevalence used to convert to liability $R^2$ | Unadjusted Variance explained (Observed $R^2$ ) | Adjusted Variance explained (Liability $R^2$ ) | Coefficient | Standard Error | P-value | Sex*PRS p-value |
|-----------|-------------------------------------------------|-------------------------------------|---------------------------------------------|----------------------------------------------------------|-------------------------------------------------|------------------------------------------------|-------------|----------------|---------|-----------------|
| MDD       | Pernicious Anemia, Possible (female)            | 0.200                               | 36,975                                      | 0.10%                                                    | 0.030%                                          | 0.031%                                         | 0.059       | 0.030          | 5.0e-02 | NA              |
| MDD       | Pernicious Anemia, Possible (male)              | 0.500                               | 67,956                                      | 0.10%                                                    | 0.059%                                          | 0.070%                                         | 0.090       | 0.048          | 6.0e-02 | NA              |
| MDD       | Pernicious Anemia, Probable (combined)          | 0.050                               | 14,137                                      | 0.10%                                                    | 0.113%                                          | 0.150%                                         | 0.131       | 0.049          | 7.2e-03 | NA              |
| MDD       | Pernicious Anemia, Probable (female)            | 0.100                               | 22,831                                      | 0.10%                                                    | 0.064%                                          | 0.082%                                         | 0.097       | 0.057          | 9.3e-02 | NA              |
| MDD       | Pernicious Anemia, Probable (male)              | 0.050                               | 14,137                                      | 0.10%                                                    | 0.380%                                          | 0.544%                                         | 0.250       | 0.093          | 6.9e-03 | NA              |
| MDD       | Polymyalgia Rheumatica/GCA, Possible (combined) | 0.200                               | 36,975                                      | 0.85%                                                    | 0.058%                                          | 0.095%                                         | 0.085       | 0.025          | 6.8e-04 | NA              |
| MDD       | Polymyalgia Rheumatica/GCA, Possible (female)   | 0.200                               | 36,975                                      | 0.85%                                                    | 0.114%                                          | 0.177%                                         | 0.116       | 0.031          | 1.5e-04 | NA              |
| MDD       | Polymyalgia Rheumatica/GCA, Possible (male)     | 0.001                               | 1,123                                       | 0.85%                                                    | 0.007%                                          | 0.012%                                         | 0.030       | 0.043          | 4.8e-01 | NA              |
| MDD       | Polymyalgia Rheumatica/GCA, Probable (combined) | 0.200                               | 36,975                                      | 0.85%                                                    | 0.074%                                          | 0.132%                                         | 0.100       | 0.034          | 2.8e-03 | NA              |
| MDD       | Polymyalgia Rheumatica/GCA, Probable (female)   | 0.200                               | 36,975                                      | 0.85%                                                    | 0.110%                                          | 0.189%                                         | 0.120       | 0.041          | 3.3e-03 | NA              |
| MDD       | Polymyalgia Rheumatica/GCA, Probable (male)     | 0.001                               | 1,123                                       | 0.85%                                                    | 0.113%                                          | 0.214%                                         | 0.128       | 0.059          | 3.0e-02 | NA              |
| MDD       | Psoriasis, Possible (combined)                  | 0.500                               | 67,956                                      | 2.00%                                                    | 0.061%                                          | 0.095%                                         | 0.076       | 0.014          | 2.5e-08 | NA              |
| MDD       | Psoriasis, Possible (female)                    | 0.500                               | 67,956                                      | 2.00%                                                    | 0.062%                                          | 0.100%                                         | 0.079       | 0.020          | 1.0e-04 | NA              |
| MDD       | Psoriasis, Possible (male)                      | 0.500                               | 67,956                                      | 2.00%                                                    | 0.060%                                          | 0.091%                                         | 0.075       | 0.019          | 5.8e-05 | 0.86            |
| MDD       | Psoriasis, Probable (combined)                  | 0.500                               | 67,956                                      | 2.00%                                                    | 0.077%                                          | 0.139%                                         | 0.093       | 0.019          | 1.4e-06 | NA              |
| MDD       | Psoriasis, Probable (female)                    | 0.500                               | 67,956                                      | 2.00%                                                    | 0.118%                                          | 0.223%                                         | 0.117       | 0.030          | 7.9e-05 | NA              |
| MDD       | Psoriasis, Probable (male)                      | 0.050                               | 14,137                                      | 2.00%                                                    | 0.061%                                          | 0.106%                                         | 0.081       | 0.025          | 1.3e-03 | NA              |
| MDD       | Psoriatic Arthritis, Possible (combined)        | 1.000                               | 99,216                                      | 0.50%                                                    | 0.105%                                          | 0.163%                                         | 0.118       | 0.030          | 9.7e-05 | NA              |
| MDD       | Psoriatic Arthritis, Possible (female)          | 1.000                               | 99,216                                      | 0.50%                                                    | 0.159%                                          | 0.248%                                         | 0.145       | 0.043          | 6.5e-04 | NA              |
| MDD       | Psoriatic Arthritis, Possible (male)            | 0.001                               | 1,123                                       | 0.50%                                                    | 0.069%                                          | 0.107%                                         | 0.095       | 0.043          | 2.6e-02 | NA              |
| MDD       | Psoriatic Arthritis, Probable (combined)        | 0.300                               | 48,852                                      | 0.50%                                                    | 0.167%                                          | 0.274%                                         | 0.153       | 0.036          | 2.2e-05 | NA              |

| Base GWAS | Target Trait in UKB                               | Optimal p-value threshold ( $P_T$ ) | No. SNPs used to construct PRS at ( $P_T$ ) | Population Prevalence used to convert to liability $R^2$ | Unadjusted Variance explained (Observed $R^2$ ) | Adjusted Variance explained (Liability $R^2$ ) | Coefficient | Standard Error | P-value | Sex*PRS p-value |
|-----------|---------------------------------------------------|-------------------------------------|---------------------------------------------|----------------------------------------------------------|-------------------------------------------------|------------------------------------------------|-------------|----------------|---------|-----------------|
| MDD       | Psoriatic Arthritis, Probable (female)            | 1.000                               | 99,216                                      | 0.50%                                                    | 0.212%                                          | 0.349%                                         | 0.173       | 0.051          | 6.4e-04 | NA              |
| MDD       | Psoriatic Arthritis, Probable (male)              | 0.001                               | 1,123                                       | 0.50%                                                    | 0.153%                                          | 0.250%                                         | 0.146       | 0.051          | 4.4e-03 | NA              |
| MDD       | Rheumatoid Arthritis, Possible (combined)         | 0.500                               | 67,956                                      | 1.00%                                                    | 0.065%                                          | 0.082%                                         | 0.078       | 0.013          | 1.1e-09 | NA              |
| MDD       | Rheumatoid Arthritis, Possible (female)           | 0.300                               | 48,852                                      | 1.00%                                                    | 0.060%                                          | 0.071%                                         | 0.072       | 0.016          | 3.5e-06 | 0.68            |
| MDD       | Rheumatoid Arthritis, Possible (male)             | 1.000                               | 99,216                                      | 1.00%                                                    | 0.090%                                          | 0.125%                                         | 0.096       | 0.022          | 1.6e-05 | 0.26            |
| MDD       | Rheumatoid Arthritis, Probable (combined)         | 0.100                               | 22,831                                      | 1.00%                                                    | 0.065%                                          | 0.095%                                         | 0.083       | 0.017          | 1.2e-06 | NA              |
| MDD       | Rheumatoid Arthritis, Probable (female)           | 0.300                               | 48,852                                      | 1.00%                                                    | 0.070%                                          | 0.096%                                         | 0.084       | 0.021          | 4.5e-05 | 0.90            |
| MDD       | Rheumatoid Arthritis, Probable (male)             | 1.000                               | 99,216                                      | 1.00%                                                    | 0.075%                                          | 0.121%                                         | 0.094       | 0.032          | 2.9e-03 | NA              |
| MDD       | Sjögren Syndrome, Possible (combined)             | 0.200                               | 36,975                                      | 0.10%                                                    | 0.064%                                          | 0.080%                                         | 0.096       | 0.040          | 1.5e-02 | NA              |
| MDD       | Sjögren Syndrome, Possible (female)               | 0.200                               | 36,975                                      | 0.10%                                                    | 0.041%                                          | 0.047%                                         | 0.073       | 0.042          | 7.9e-02 | NA              |
| MDD       | Sjögren Syndrome, Possible (male)                 | 0.050                               | 14,137                                      | 0.10%                                                    | 0.517%                                          | 0.799%                                         | 0.305       | 0.128          | 1.8e-02 | NA              |
| MDD       | Sjögren Syndrome, Probable (combined)             | 1.000                               | 99,216                                      | 0.10%                                                    | 0.042%                                          | 0.057%                                         | 0.081       | 0.051          | 1.1e-01 | NA              |
| MDD       | Sjögren Syndrome, Probable (female)               | 0.200                               | 36,975                                      | 0.10%                                                    | 0.028%                                          | 0.035%                                         | 0.064       | 0.054          | 2.4e-01 | NA              |
| MDD       | Sjögren Syndrome, Probable (male)                 | 0.500                               | 67,956                                      | 0.10%                                                    | 0.375%                                          | 0.605%                                         | 0.265       | 0.158          | 9.3e-02 | NA              |
| MDD       | Systemic Lupus Erythematosus, Possible (combined) | 0.050                               | 14,137                                      | 0.10%                                                    | 0.097%                                          | 0.123%                                         | 0.119       | 0.040          | 3.2e-03 | NA              |
| MDD       | Systemic Lupus Erythematosus, Possible (female)   | 0.050                               | 14,137                                      | 0.10%                                                    | 0.111%                                          | 0.130%                                         | 0.122       | 0.044          | 5.3e-03 | NA              |
| MDD       | Systemic Lupus Erythematosus, Possible (male)     | 1.000                               | 99,216                                      | 0.10%                                                    | 0.180%                                          | 0.265%                                         | 0.175       | 0.102          | 8.7e-02 | NA              |
| MDD       | Systemic Lupus Erythematosus, Probable (combined) | 0.050                               | 14,137                                      | 0.10%                                                    | 0.170%                                          | 0.231%                                         | 0.163       | 0.053          | 2.1e-03 | NA              |

| Base GWAS | Target Trait in UKB                             | Optimal p-value threshold ( $P_T$ ) | No. SNPs used to construct PRS at ( $P_T$ ) | Population Prevalence used to convert to liability $R^2$ | Unadjusted Variance explained (Observed $R^2$ ) | Adjusted Variance explained (Liability $R^2$ ) | Coefficient | Standard Error | P-value | Sex*PRS p-value |
|-----------|-------------------------------------------------|-------------------------------------|---------------------------------------------|----------------------------------------------------------|-------------------------------------------------|------------------------------------------------|-------------|----------------|---------|-----------------|
| MDD       | Systemic Lupus Erythematosus, Probable (female) | 0.050                               | 14,137                                      | 0.10%                                                    | 0.190%                                          | 0.242%                                         | 0.166       | 0.057          | 3.5e-03 | NA              |
| MDD       | Systemic Lupus Erythematosus, Probable (male)   | 0.500                               | 67,956                                      | 0.10%                                                    | 0.154%                                          | 0.243%                                         | 0.168       | 0.141          | 2.3e-01 | NA              |
| MDD       | Type 1 Diabetes, Possible (combined)            | 0.400                               | 59,001                                      | 0.30%                                                    | 0.082%                                          | 0.098%                                         | 0.096       | 0.019          | 6.0e-07 | NA              |
| MDD       | Type 1 Diabetes, Possible (female)              | 1.000                               | 99,216                                      | 0.30%                                                    | 0.126%                                          | 0.156%                                         | 0.121       | 0.030          | 4.5e-05 | 0.18            |
| MDD       | Type 1 Diabetes, Possible (male)                | 0.300                               | 48,852                                      | 0.30%                                                    | 0.066%                                          | 0.075%                                         | 0.084       | 0.025          | 8.7e-04 | NA              |
| MDD       | Type 1 Diabetes, Probable (combined)            | 0.500                               | 67,956                                      | 0.30%                                                    | 0.089%                                          | 0.110%                                         | 0.102       | 0.021          | 1.4e-06 | NA              |
| MDD       | Type 1 Diabetes, Probable (female)              | 1.000                               | 99,216                                      | 0.30%                                                    | 0.117%                                          | 0.149%                                         | 0.119       | 0.032          | 2.2e-04 | NA              |
| MDD       | Type 1 Diabetes, Probable (male)                | 0.300                               | 48,852                                      | 0.30%                                                    | 0.081%                                          | 0.097%                                         | 0.095       | 0.028          | 6.1e-04 | NA              |

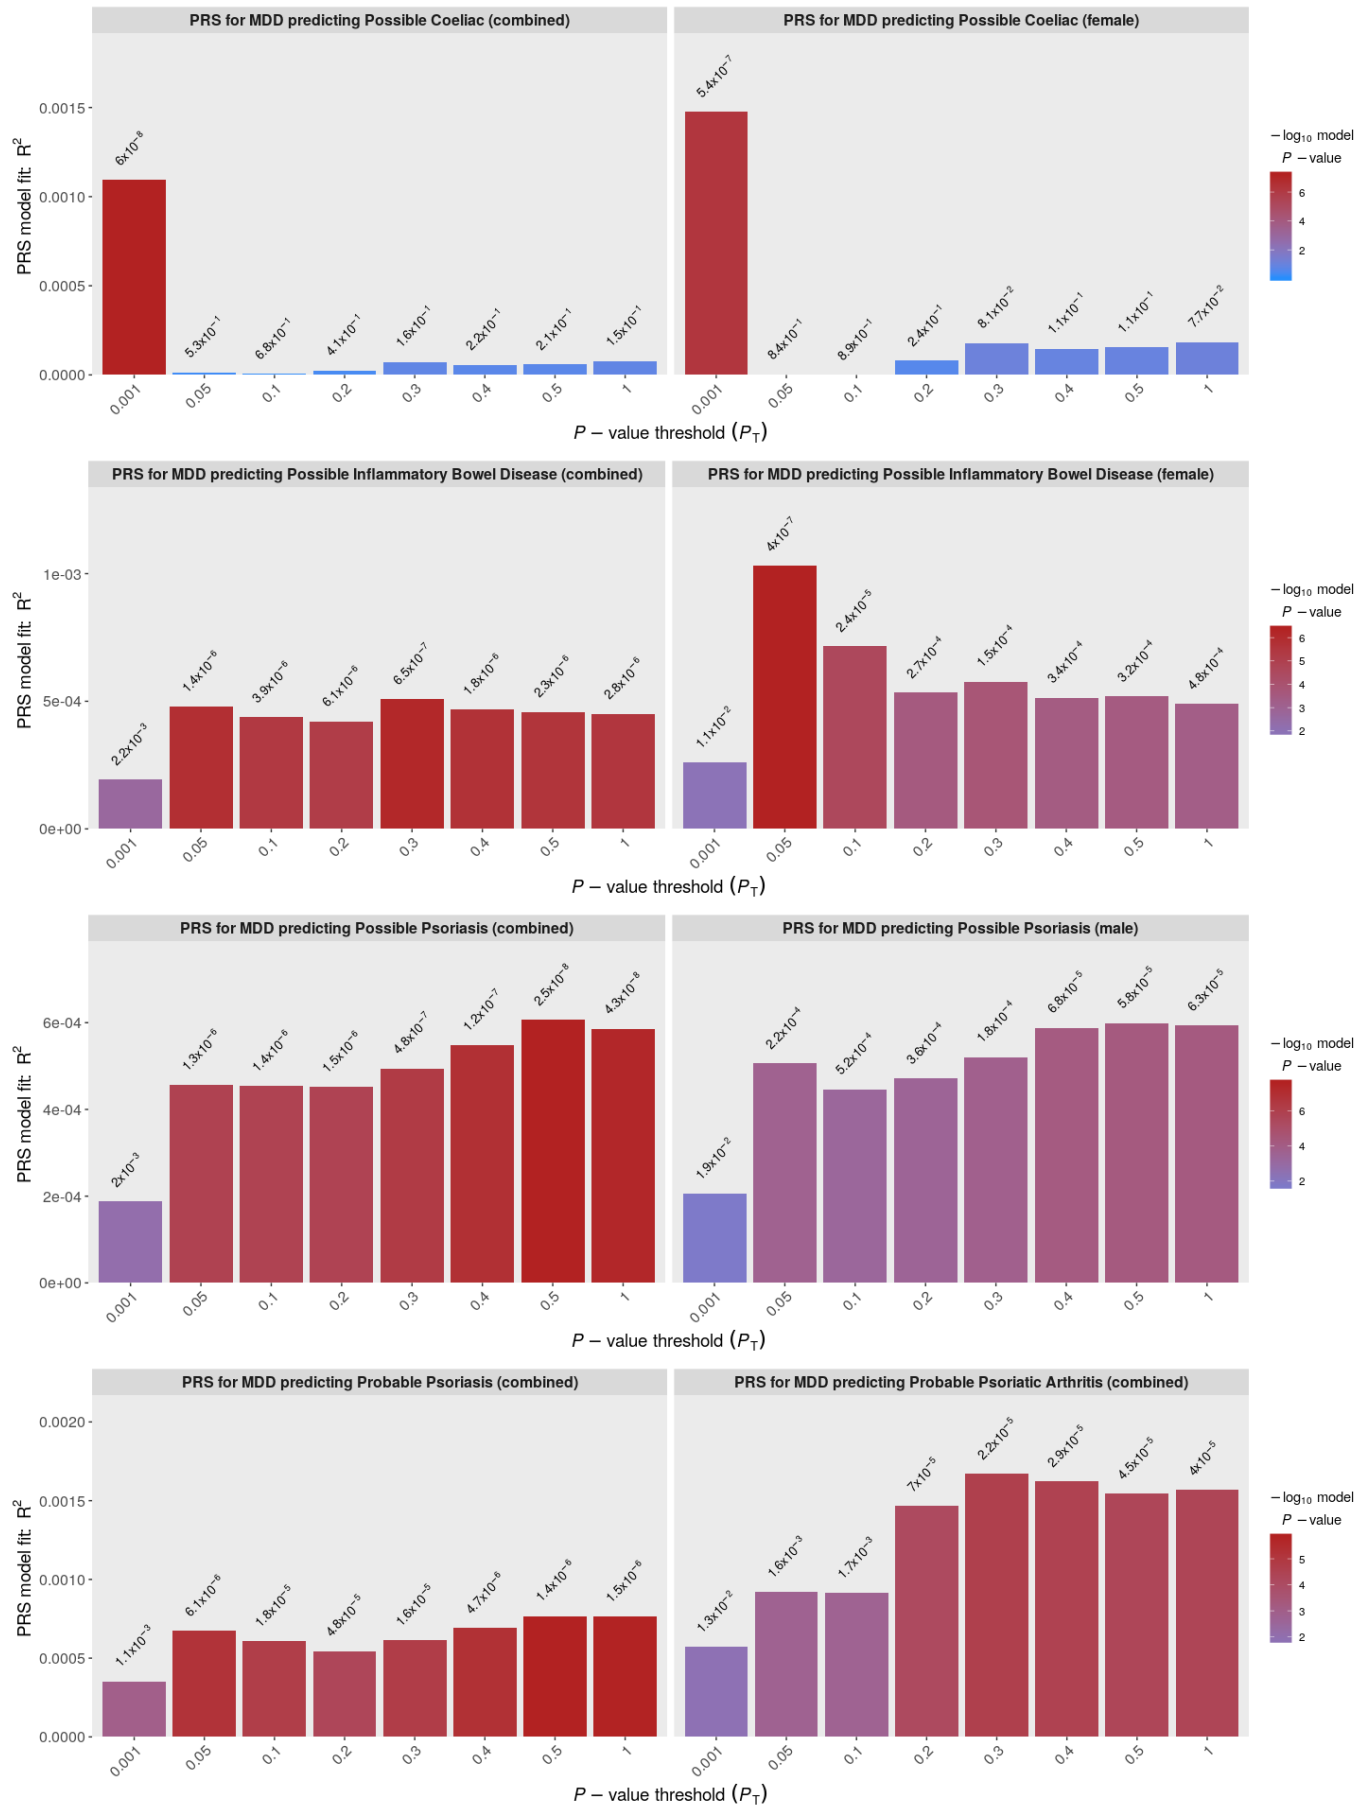

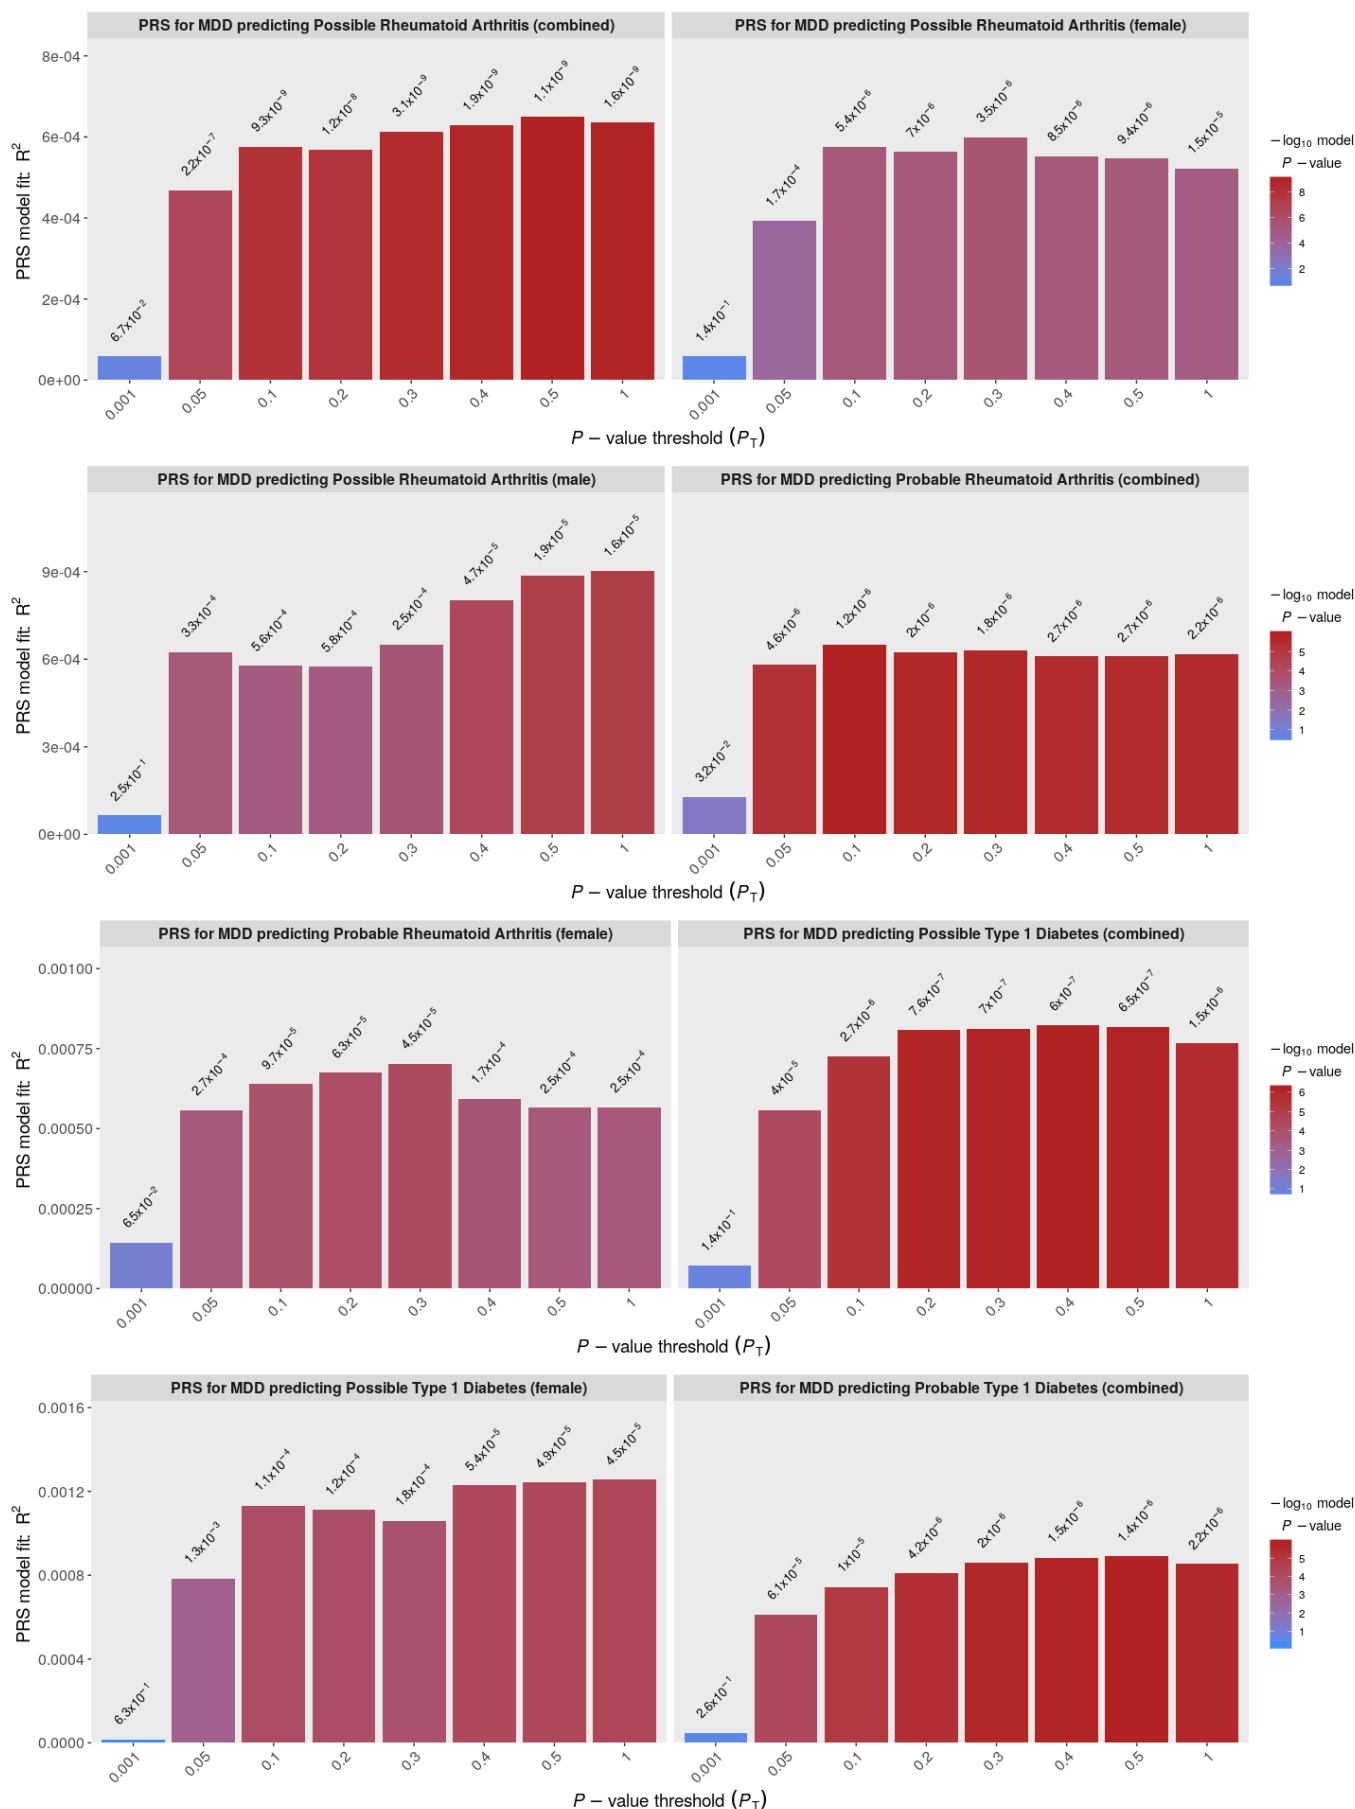

**Supplementary Figure S7:** Cross-trait PRS associations between PRS for MDD and autoimmune case/control status (possible/probable) in men and women across eight  $P_T$ . Y-axis shows unadjusted  $R^2$  (observed-scale). Bar charts are shown for significant results only.

### 3 Genetic correlations

**Supplementary Table S7:** Genetic correlations between autoimmune traits and ‘any’ and ‘stringent’ depression in the UKB. Associations with p-values  $< 4.1 \times 10^{-3}$ , meeting Bonferroni correction, highlighted in red.

|                              | $r_G$          | 95% CIs      | P-value | $r_G$                | 95% CIs      | P-value |
|------------------------------|----------------|--------------|---------|----------------------|--------------|---------|
| Autoimmune Disease           | Any depression |              |         | Stringent depression |              |         |
| Coeliac Disease              | 0.017          | -0.10 - 0.14 | 7.8e-01 | 0.048                | -0.10 - 0.19 | 5.2e-01 |
| Inflammatory Bowel Disease   | 0.106          | 0.03 - 0.18  | 3.8e-03 | 0.157                | 0.07 - 0.24  | 3.0e-04 |
| Multiple Sclerosis           | 0.302          | 0.06 - 0.55  | 1.6e-02 | 0.375                | 0.07 - 0.68  | 1.5e-02 |
| Psoriasis                    | 0.064          | -0.01 - 0.14 | 9.0e-02 | 0.161                | 0.06 - 0.26  | 1.1e-03 |
| Rheumatoid Arthritis         | 0.004          | -0.06 - 0.07 | 9.0e-01 | 0.104                | 0.02 - 0.19  | 1.7e-02 |
| Systemic Lupus Erythematosus | -0.001         | -0.11 - 0.10 | 9.9e-01 | 0.126                | 0.00 - 0.25  | 5.1e-02 |
